# Supplementary material for: Depression following fracture in women: a study of age-matched cohorts
Source: PubMed Central journal article supplement — BMJ Open. 2014 Feb 21;4(2):e004226. doi: 10.1136/bmjopen-2013-004226 (PMC3931986; doi:10.1136/bmjopen-2013-004226), 2014-02-21
Supplement: bmjopen-2013-004226.draft_revisions.pdf [file bmjopen-2013-004226.draft_revisions.pdf]

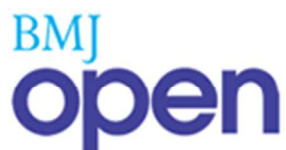

**DEPRESSION FOLLOWING FRACTURE IN ADULT WOMEN: A  
CASE CONTROL STUDY**

|                                    |                                                                                                                                                                                                                                                                  |
|------------------------------------|------------------------------------------------------------------------------------------------------------------------------------------------------------------------------------------------------------------------------------------------------------------|
| Journal:                           | <i>BMJ Open</i>                                                                                                                                                                                                                                                  |
| Manuscript ID:                     | bmjopen-2013-004226                                                                                                                                                                                                                                              |
| Article Type:                      | Research                                                                                                                                                                                                                                                         |
| Date Submitted by the Author:      | 13-Oct-2013                                                                                                                                                                                                                                                      |
| Complete List of Authors:          | Williams, Lana; Deakin University,<br>Berk, Michael; Deakin University,<br>Henry, Margaret; Barwon Health,<br>Stuart, Amanda; Deakin University,<br>Brennan, Sharon; Deakin University,<br>Jacka, Felice; Deakin University,<br>Pasco, Julie; Deakin University, |
| <b>Primary Subject<br>Heading</b>: | Epidemiology                                                                                                                                                                                                                                                     |
| Secondary Subject Heading:         | Mental health                                                                                                                                                                                                                                                    |
| Keywords:                          | EPIDEMIOLOGY, GERIATRIC MEDICINE, Musculoskeletal disorders <<br>ORTHOPAEDIC & TRAUMA SURGERY, Adult psychiatry < PSYCHIATRY                                                                                                                                     |
|                                    |                                                                                                                                                                                                                                                                  |

SCHOLARONE™  
Manuscripts

**DEPRESSION FOLLOWING FRACTURE IN ADULT WOMEN: A CASE CONTROL STUDY**

Running title: Depression following fracture in women

Lana J Williams<sup>1,2</sup>: [lanaw@barwonhealth.org.au](mailto:lanaw@barwonhealth.org.au)

Michael Berk<sup>1,2,3,4</sup>: [mikebe@barwonhealth.org.au](mailto:mikebe@barwonhealth.org.au)

Margaret J Henry<sup>5</sup>: [margh@barwonhealth.org.au](mailto:margh@barwonhealth.org.au)

Amanda L Stuart<sup>1</sup>: [amandh@barwonhealth.org.au](mailto:amandh@barwonhealth.org.au)

Sharon L Brennan<sup>1,6,7</sup>: [sharob@barwonhealth.org.au](mailto:sharob@barwonhealth.org.au)

Felice N Jacka<sup>1,2</sup>: [felice@barwonhealth.org.au](mailto:felice@barwonhealth.org.au)

Julie A Pasco<sup>1,6</sup>: [juliep@barwonhealth.org.au](mailto:juliep@barwonhealth.org.au)

**Word count:** 1842 words

**Affiliations:**

<sup>1</sup> IMPACT Strategic Research Centre, School of Medicine, Deakin University, Geelong, Australia

<sup>2</sup> Department of Psychiatry, The University of Melbourne, Parkville, Australia

<sup>3</sup> Orygen Youth Health Research Centre, Parkville, Australia

<sup>4</sup> Florey Institute of Neuroscience and Mental Health, Parkville, Australia

<sup>5</sup> Department of Medicine, Barwon Health, Deakin University

<sup>6</sup> NorthWest Academic Centre, Department of Medicine, The University of Melbourne, Western Health, St Albans, Australia

<sup>7</sup> Australian Institute for Musculoskeletal Science, Melbourne, Australia

1  
2  
3  
4  
5  
6  
7  
8 **Corresponding author and contact for re-print requests:**  
9

10 Dr Lana Williams

11  
12 Deakin University

13  
14 School of Medicine

15  
16 PO Box 281, Geelong 3220, Australia

17  
18 Tel: +61 3 4215 3303 Fax +61 3 4215 3491

19  
20  
21 Email: lanaw@barwonhealth.org.au  
22  
23  
24  
25  
26  
27  
28  
29  
30  
31  
32  
33  
34  
35  
36  
37  
38  
39  
40  
41  
42  
43  
44  
45  
46  
47  
48  
49  
50  
51  
52  
53  
54  
55  
56  
57  
58  
59  
60

**ABSTRACT**

**Objectives:** High levels of disability, functional impairment and mortality are independently associated with both fracture and depression, however the relationship between these is uncertain. The aim of this study was to investigate whether fracture is associated with depressive symptoms in a population-based sample of adult women.

**Design:** Case control study

**Setting:** Barwon Statistical Division, South Eastern Australia.

**Participants:** Two samples of women aged  $\geq 35$ yr were drawn from the Geelong Osteoporosis Study (GOS). Eligible women with incident fracture identified from radiology reports, and non-fracture controls were randomly selected from the electoral roll during 1994-6.

**Outcome measure:** Symptoms of depression for both the cases and controls during the 12-month period 2000-1 were identified by self-report questionnaire based on Diagnostic and Statistical Manual of Mental Disorders, 4<sup>th</sup> Edition (DSM-IV) criteria.

**Results:** A total of 296 fracture cases (12 hip, 48 vertebral, 91 wrist/forearm, 17 upper arm, 7 pelvis, 11 rib, 62 lower leg and 48 other fractures) and 590 controls were included. Associations between fracture and depression differed between younger ( $\leq 65$ yr) and older ( $> 65$ yr) women. Age and weight adjusted odds ratio for depression following fracture among younger women was 0.62 (0.35-1.11,  $p=0.11$ ) and 3.33 (1.24-8.98,  $p=0.02$ ) for older women. Further adjustment for lifestyle factors did not affect the results.

1  
2  
3 **Conclusions:** These findings indicate that differences in mood status exist between  
4  
5 older and younger women following fracture and that depression is a persistent  
6  
7 health burden, likely to be affecting long-term recovery in the elderly. Assessment of  
8  
9 mood status in both the short and long term following fracture in the elderly seems  
10  
11 justified, with early detection and treatment likely to result in improved outcomes.  
12  
13

14  
15  
16  
17 **Key Words:** Fracture; Depression; Psychiatric illness; Quality of Life; Osteoporosis  
18  
19  
20  
21  
22  
23  
24  
25  
26  
27  
28  
29  
30  
31  
32  
33  
34  
35  
36  
37  
38  
39  
40  
41  
42  
43  
44  
45  
46  
47  
48  
49  
50  
51  
52  
53  
54  
55  
56  
57  
58  
59  
60

**STRENGTHS AND LIMITATIONS OF THIS STUDY**

- To our knowledge, there are no published studies investigating post fracture depression among the younger, fracture sites other than the hip, or studies with longer follow up periods; these are all strengths of the current study.
- The time lag between fracture and depression measurement, an inability to provide pre-event psychiatric status and the use of a self-report instrument to determine depression are limitations.

## BACKGROUND

Independently, depression and fracture are both increasingly prevalent public health concerns, associated with high levels of disability, functional impairment and mortality. Depression is common and often persistent following a medical event, adversely affecting outcomes and prognosis by hindering adherence to treatment regimes and diminishing quality of life [1]. It is estimated that up to 20% of adults are affected by depression [2, 3], regardless of co-morbid medical conditions, with over \$644 million per annum spent on health system costs in Australia alone [4].

As a result of an interaction between an ageing population and environmental and medical factors, fracture rates and the associated burden are projected to rise substantially [5, 6]. It has been estimated that the lifetime risk of fracture lies within the range of 40% to 50% in women and 13% to 22% in men [7]. In 2000, the estimated number of fragility fractures worldwide was 9.0 million of which 1.6 million were hip, 1.7 million forearm and 1.4 million clinical vertebral fractures, with 61.0% occurring in women [8].

Declines in quality of life are typical following a fracture and impose substantial medical and social costs [9]. Furthermore, poorer psychological health has also been observed, with the associated declines in physical functioning, physical disability, and a loss of independence associated with fracture [10-12]. A review investigating outcomes following hip fracture concluded that post injury depressive symptoms are common and a strong predictor of poor recovery [11].

1  
2  
3  
4  
5 It is likely that a bi-directional relationship between depression and fracture exists.  
6  
7  
8 Recently, depression has been shown to precede fracture, possibly influenced by  
9  
10 medication use and biological and lifestyle factors dysregulated in depression [13].  
11  
12 Given that depression has been shown to be a likely response to chronic medical  
13 conditions, as well as the previously reported associations showing depression to  
14 precede fracture, the aim of this case-control study was to investigate whether  
15 fracture is associated with depressive symptoms.  
16  
17  
18  
19  
20  
21  
22  
23  
24  
25  
26  
27  
28  
29  
30  
31  
32  
33  
34  
35  
36  
37  
38  
39  
40  
41  
42  
43  
44  
45  
46  
47  
48  
49  
50  
51  
52  
53  
54  
55  
56  
57  
58  
59  
60



## METHODS

### Participants

This study included women participating in the Geelong Osteoporosis Study (GOS), who were recruited from the Barwon Statistical Division (BSD) situated in south-eastern Australia to investigate the epidemiology of osteoporosis and fracture [14]. All participants gave written, informed consent, and the study was approved by the Human Research Ethics Committee at Barwon Health.

### *Fracture cases*

Women identified from radiological reports as having sustained an incident fracture between February 1994 to February 1996 ( $n = 1397$ ), living in the BSD at the time of recruitment and aged 35 years and older were invited to participate in the fracture cohort of the GOS [15]. The process of fracture ascertainment from radiological reports has previously been validated [16]. A total of 1082 women were eligible for participation, with 77.4% accepting initial involvement ( $n=832$ ). Those who participated in the 6-year follow up ( $n=439$ ) were sent a depression questionnaire, with a total of 296 returned (67%) and thus included in this study (median age 63.0yr, range 35-87yr).

### *Non-Fracture controls*

Between 1994 and 1997 an age-stratified, random sample of women residing in the BSD was recruited from the Commonwealth electoral rolls. The initial group totalled 1494 women (median age 54yr, range 20-94yr), with a participation rate of 77.1% [17]. Those eligible to participate in the 6-year follow up (n=1275) were sent a depression questionnaire, with a total of 758 returned (60%). For this current study, 590 women aged 35 years and older (median age 59.3yr, range 35-91yr) were included.

### **Measurements**

#### **Outcome variable**

Symptoms of depression during the 12-month period 2000-1 were identified using a self-report questionnaire based on the Diagnostic and Statistical Manual of Mental Disorders, Fourth Edition (DSM-IV) criteria [18]. An episode of major depression was defined as a depressed mood state and a loss of interest and pleasure in usual activity lasting for at least a two-week period. In addition, the presence of at least four symptoms including weight change, sleep disturbance, psychomotor changes, fatigue, feelings of worthlessness, poor concentration, and suicidal ideation had to be evident, accompanied by diminished physical performance determined to be causing distress or impairment in at least one domain of work, social or personal

1  
2  
3 functioning. The Cronbach's alpha co-efficient for determining internal reliability of  
4  
5 the questionnaire was 0.895 [19].  
6  
7  
8  
9

### 10 **Exposure variables**

11  
12  
13  
14  
15 Body weight and height were measured to the nearest 0.1 kg and 0.1 cm,  
16  
17 respectively. Information on lifestyle and other health factors was obtained via self-  
18  
19 report questionnaire. Women were classed as physically active if they participated in  
20  
21 light to vigorous activity on a regular basis. Tobacco smoking was recognised if  
22  
23 practised currently, and alcohol use recognised if average consumption exceeded  
24  
25 two standard drinks per day.  
26  
27  
28  
29  
30

### 31 **Statistical Analyses**

32  
33  
34  
35  
36 Statistical analyses were completed using Minitab (Version 15; Minitab, State College  
37  
38 PA). Associations between fracture and depression differed for younger and older  
39  
40 women, thus all analyses were stratified by age ( $\leq 65$ yr and  $> 65$  years). Differences in  
41  
42 characteristics between the fracture cases and controls according to age group were  
43  
44 compared using t-tests for continuous parametric data, Mann-Whitney for  
45  
46 continuous non-parametric and chi-square analyses for categorical data. Logistic  
47  
48 regression was used to determine the association between fracture and the  
49  
50 likelihood of depressive symptoms among the younger ( $\leq 65$ yr) and older ( $> 65$ )  
51  
52 women. Age, anthropometry, physical activity, smoking and alcohol use were tested  
53  
54  
55  
56  
57  
58  
59  
60

1  
2  
3  
4  
5  
6  
7  
8  
9  
10  
11  
12  
13  
14  
15  
16  
17  
18  
19  
20  
21  
22  
23  
24  
25  
26  
27  
28  
29  
30  
31  
32  
33  
34  
35  
36  
37  
38  
39  
40  
41  
42  
43  
44  
45  
46  
47  
48  
49  
50  
51  
52  
53  
54  
55  
56  
57  
58  
59  
60

in the models as potential confounders and/or effect modifiers. Values of  $p < 0.05$  were considered as significant.

For peer review only

## RESULTS

A total of 296 fracture cases (12 hip, 48 vertebral, 92 wrist/forearm, 17 upper arm, 7 pelvis, 12 rib, 64 lower leg and 48 other fractures) and 590 controls were included in the analyses. Characteristics of the fracture cases and controls according to age are shown in Table 1.

### *Younger women ( $\leq 65$ years)*

Among the younger women (n=552), there were no differences in weight, height, physical activity or alcohol consumption between the fracture cases and the controls, however the fracture cases were older, more likely to smoke and less likely to have depression (Table 1).

The unadjusted odds of having depression following fracture was 0.60 (95% CI 0.34-1.06, p=0.08) compared to controls. The relationship was attenuated after adjusting for age and weight (OR=0.62, 95% CI 0.35-1.11, p=0.12). Further adjustment for height, physical activity, smoking and alcohol consumption did not affect the relationships.

1  
2  
3 *Older women (>65 years)*  
4  
5  
6

7  
8 Among the older women (n=334), no differences in weight, height, physical activity,  
9  
10 alcohol or smoking status were evident between the cases and controls; however  
11  
12 the fracture cases were younger and more likely to have depression (Table 1).  
13

14  
15  
16  
17 The odds of having depression following fracture was three times greater (OR 3.02,  
18  
19 95% CI 1.16-7.89, p=0.02) for the fracture cases compared to controls. Adjusting for  
20  
21 age and weight did not affect the relationship (OR=3.33, 95% CI 1.24-8.98, p=0.02),  
22  
23 which was also sustained after further adjustment for height, physical activity,  
24  
25 smoking and alcohol consumption.  
26  
27  
28  
29  
30  
31  
32  
33  
34  
35  
36  
37  
38  
39  
40  
41  
42  
43  
44  
45  
46  
47  
48  
49  
50  
51  
52  
53  
54  
55  
56  
57  
58  
59  
60

## DISCUSSION

The findings from this case-control study indicate an association between fracture and depression, although only among older women. Those aged >65 years were up to three-times more likely to have depression post fracture, while this relationship was not evident for younger women ( $\leq 65$  years). These associations were independent of age, anthropometry, and lifestyle factors.

Our findings suggesting the risk of depression post fracture is increased among older women are consistent with findings from previous studies. Recently, several publications have explored health outcomes following hip fracture surgery and found depression to be common and to impact negatively on recovery up to two years post fracture [20-22]. A systematic review that investigated the prevalence of psychiatric illness in hip fracture patients found that the prevalence of depression following fracture ranged from 9% to 47% [23]; those rates being somewhat higher than community rates. Similarly, the prevalence of depressive symptoms in postmenopausal women with osteoporosis was reported to be greater for women who also had prevalent vertebral fractures compared to those without [24]. Both depressive symptoms following fracture and pre-injury mood state have been shown to be predictive of recovery in the elderly, while a failure to regain pre-injury functional and ability levels increases the possibility of persistent depressive symptomatology [10, 25]. In a prospective cohort study of 240 older participants, those who experienced high levels of depressive symptoms prior to a medical event (hip fracture, stroke and heart attack), had a poorer likelihood of recovery in

1  
2  
3 activities of daily living [26]. Lastly, a recent study using a cultural models approach  
4  
5 to understand how older women viewed osteoporosis reported that experiencing a  
6  
7 fracture coincided with the acknowledgement of 'getting older' [27], thus we may  
8  
9 expect a fracture to increase the likelihood of depression for some older women. It is  
10  
11 plausible that stigma may be associated with a fracture in older age [27], and thus  
12  
13 impact negatively on an older woman's self-identity. Taken in context, although a  
14  
15 lower prevalence of depression overall has been reported among older women [3],  
16  
17 the occurrence of a fracture may enhance the susceptibility to depression for a  
18  
19 variety of reasons.  
20  
21  
22  
23

24  
25  
26 Our findings suggest no relationship between fracture and later depression among  
27  
28 younger women. It is plausible that the causal pathway to fracture may differ across  
29  
30 age groups, resulting in differing effects on psychological and physical outcomes. For  
31  
32 instance, an internal locus of control (the belief one can control one's own life), high  
33  
34 self-esteem, hope, acceptance, optimism, and a sense of mastery have all been  
35  
36 associated with resilience or the ability to maintain or regain mental health following  
37  
38 adversity [28]. Furthermore, differences in pre-morbid emotional and cognitive state  
39  
40 may have existed between the younger and older women prior to fracture. This is an  
41  
42 important factor, as high positive affect and motivation has been observed as  
43  
44 increasing the chances of returning to pre-morbid levels of functioning after a major  
45  
46 health event [26]. Lastly, compared to older women, younger women may have  
47  
48 more access to social networks on which they can draw on for support, be less likely  
49  
50 to remain homebound post-fracture, and be able to fulfil ongoing work and social  
51  
52 commitments during recovery.  
53  
54  
55  
56  
57  
58  
59  
60



1  
2  
3  
4  
5 Some methodological issues should be considered when interpreting the study  
6 findings. The time lag between fracture and depression measurement and an  
7 inability to provide pre-event psychiatric status is a limitation; however it has to be  
8 taken into consideration that depression is a long-term, recurrent disorder in most  
9 individuals [29]. The use of a self-report instrument, rather than a clinical diagnostic  
10 interview must also be acknowledged. Response bias may also have influenced the  
11 findings, with higher rates of psychopathology and other co-morbid conditions being  
12 present in the population declining participation. To our knowledge, there are no  
13 published studies investigating post fracture depression among the younger, fracture  
14 sites other than the hip, or studies with longer follow up periods; these are all  
15 strengths of the current study.  
16  
17  
18  
19  
20  
21  
22  
23  
24  
25  
26  
27  
28  
29  
30  
31  
32  
33  
34  
35

## 36 CONCLUSION

37  
38  
39  
40 In conclusion, this study demonstrated that differences in mood status exist between  
41 older and younger women following fracture and that depression is a persistent  
42 health burden, likely to affect long-term recovery in the elderly. Assessment of mood  
43 status in both the short- and long-term following fracture in the elderly seems  
44 justified, with early detection and treatment of elevated levels of depression likely to  
45 result in improved outcomes. Further research investigating a causal link between  
46 fracture and depression is warranted and is currently underway.  
47  
48  
49  
50  
51  
52  
53  
54  
55  
56  
57  
58  
59  
60

**FUNDING STATEMENTS**

This work was supported by the National Health and Medical Research Council (NHMRC) of Australia. The funding providers played no role in the design or conduct of the study; collection, management, analysis, and interpretation of the data; or in preparation, review, or approval of the manuscript.

**COMPETING INTERESTS**

Lana Williams has received Grant/Research support from Eli Lilly, Pfizer, The University of Melbourne, Deakin University and the NHMRC.

Michael Berk has received Grant/Research Support from the NIH, Simons Foundation, CRC for Mental Health, Stanley Medical Research Institute, MBF, NHMRC, Beyond Blue, Geelong Medical Research Foundation, Bristol Myers Squibb, Eli Lilly, Glaxo SmithKline, Organon, Novartis, Mayne Pharma, Servier and Astra Zeneca. He has been a paid consultant for Astra Zeneca, Bristol Myers Squibb, Eli Lilly, Glaxo SmithKline, Janssen Cilag, Lundbeck and Pfizer and a paid speaker for Astra Zeneca, Bristol Myers Squibb, Eli Lilly, Glaxo SmithKline, Janssen Cilag, Lundbeck, Organon, Pfizer, Sanofi Synthelabo, Solvay and Wyeth.

Margaret Henry and Amanda Stuart have no conflicts of interest, including specific financial interests and relationships and affiliations relevant to the subject matter or materials discussed in the manuscript.

1  
2  
3  
4  
5 Sharon Brennan has received Grant/Research support from The University of  
6  
7 Melbourne, and the NHMRC.  
8  
9

10  
11  
12 Felice Jacka has received Grant/Research support from the Brain and Behaviour  
13  
14 Research Institute, NHMRC, Australian Rotary Health, Geelong Medical Research  
15  
16 Foundation and The University of Melbourne, and has been a paid speaker for  
17  
18 Sanofi-Synthelabo, Janssen Cilag, Servier, Pfizer, Network Nutrition, Health Ed and Eli  
19  
20 Lilly.  
21  
22  
23

24  
25  
26 Julie Pasco has received speaker fees from Amgen, Eli Lilly and Sanofi-Aventis and  
27  
28 funding from the Geelong Region Medical Research Foundation, Barwon Health,  
29  
30 Perpetual Trustees, the Dairy Research and Development Corporation, The  
31  
32 University of Melbourne, the Ronald Geoffrey Arnott Foundation, ANZ Charitable  
33  
34 Trust, the American Society for Bone and Mineral Research, Amgen (Europe) GmbH  
35  
36 and the NHMRC.  
37  
38  
39  
40  
41  
42

#### 43 **AUTHORS' CONTRIBUTIONS**

44  
45  
46  
47

48 LJW took part in the conception and design of the study, data cleaning, statistical  
49  
50 analysis, interpretation of the data and took primary responsibility for writing the  
51  
52 manuscript. MB and SLB took part in the interpretation of data and critically revised  
53  
54 the manuscript. MH and ALS took part in the conception and design of the study,  
55  
56 statistical analysis, interpretation of the data and critically revised the manuscript.  
57  
58  
59  
60

1  
2  
3  
4  
5  
6  
7  
8  
9  
10  
11  
12  
13  
14  
15  
16  
17  
18  
19  
20  
21  
22  
23  
24  
25  
26  
27  
28  
29  
30  
31  
32  
33  
34  
35  
36  
37  
38  
39  
40  
41  
42  
43  
44  
45  
46  
47  
48  
49  
50  
51  
52  
53  
54  
55  
56  
57  
58  
59  
60

FNJ took part in the conception and design of the study, acquisition of the data and critically revised the manuscript. JAP took part in the conception and design of the study, interpretation of the analysis and critically revised the manuscript. All authors read and approved the final manuscript.

For peer review only

## REFERENCES

1. Lenze EJ, Rogers JC, Martire LM, Mulsant BH, Rollman BL, Dew MA, Schulz R, Reynolds CF, 3rd: The association of late-life depression and anxiety with physical disability: a review of the literature and prospectus for future research. *Am J Geriatr Psychiatry* 2001, **9**(2):113-135.
2. Kessler RC, Angermeyer M, Anthony JC, De Graaf R, Demyttenaere K, Gasquet I, G DEG, Gluzman S, Gureje O, Haro JM *et al*: Lifetime prevalence and age-of-onset distributions of mental disorders in the World Health Organization's World Mental Health Survey Initiative. *World Psychiatry* 2007, **6**(3):168-176.
3. Williams L, Jacka F, Pasco J, Henry M, Dodd S, Nicholson G, Kotowicz M, Berk M: The prevalence of mood and anxiety disorders in Australian women. *Australas Psychiatry* 2010, **18**(3):250-255.
4. Mathers C, Vos T, Stevenson C: The burden of disease and injury in Australia. In.: Australian Institute of Health and Welfare; 1999.
5. Gullberg B, Johnell O, Kanis JA: World-wide projections for hip fracture. *Osteoporos Int* 1997, **7**(5):407-413.
6. Sanders KM, Nicholson GC, Ugoni AM, Pasco JA, Seeman E, Kotowicz MA: Health burden of hip and other fractures in Australia beyond 2000. Projections based on the Geelong Osteoporosis Study. *Med J Aust* 1999, **170**(10):467-470.
7. Dennison E, Mohamed MA, Cooper C: Epidemiology of osteoporosis. *Rheum Dis Clin North Am* 2006, **32**(4):617-629.

- 1
- 2
- 3 8. Johnell O, Kanis JA: An estimate of the worldwide prevalence and disability
- 4 associated with osteoporotic fractures. *Osteoporos Int* 2006, **17**(12):1726-
- 5 1733.
- 6
- 7
- 8
- 9
- 10 9. Pasco JA, Sanders KM, Hoekstra FM, Henry MJ, Nicholson GC, Kotowicz MA:
- 11 The human cost of fracture. *Osteoporos Int* 2005, **16**(12):2046-2052.
- 12
- 13
- 14 10. Lenze EJ, Munin MC, Dew MA, Rogers JC, Seligman K, Mulsant BH, Reynolds
- 15 CF, 3rd: Adverse effects of depression and cognitive impairment on
- 16 rehabilitation participation and recovery from hip fracture. *Int J Geriatr*
- 17 *Psychiatry* 2004, **19**(5):472-478.
- 18
- 19
- 20
- 21
- 22
- 23
- 24 11. Holmes J, House A: Psychiatric illness predicts poor outcome after surgery for
- 25 hip fracture: a prospective cohort study. *Psychol Med* 2000, **30**(4):921-929.
- 26
- 27
- 28
- 29 12. Magaziner J, Simonsick EM, Kashner TM, Hebel JR, Kenzora JE: Predictors of
- 30 functional recovery one year following hospital discharge for hip fracture: a
- 31 prospective study. *J Gerontol* 1990, **45**(3):M101-107.
- 32
- 33
- 34
- 35
- 36 13. Wu Q, Liu J, Gallegos-Orozco JF, Hentz JG: Depression, fracture risk, and bone
- 37 loss: a meta-analysis of cohort studies. *Osteoporos Int* 2010, **21**(10):1627-
- 38 1635.
- 39
- 40
- 41
- 42
- 43 14. Pasco J, Nicholson G, Kotowicz M: Cohort profile: Geelong Osteoporosis
- 44 Study. *Int J Epidemiol* 2011:1-11.
- 45
- 46
- 47
- 48 15. Sanders KM, Seeman E, Ugoni AM, Pasco JA, Martin TJ, Skoric B, Nicholson
- 49 GC, Kotowicz MA: Age- and gender-specific rate of fractures in Australia: a
- 50 population-based study. *Osteoporos Int* 1999, **10**(3):240-247.
- 51
- 52
- 53
- 54
- 55
- 56
- 57
- 58
- 59
- 60

- 1  
2  
3 16. Pasco JA, Henry MJ, Gaudry TM, Nicholson GC, Kotowicz MA: Identification of  
4  
5 incident fractures: the Geelong Osteoporosis Study. *Aust N Z J Med* 1999,  
6  
7 **29**(2):203-206.
- 8  
9  
10 17. Henry MJ, Pasco JA, Nicholson GC, Seeman E, Kotowicz MA: Prevalence of  
11  
12 osteoporosis in Australian women: Geelong Osteoporosis Study. *J Clin*  
13  
14 *Densitom* 2000, **3**(3):261-268.
- 15  
16  
17 18. American Psychiatric Association: Diagnostic and Statistical Manual of Mental  
18  
19 Disorders, 4th Edition, Text Revision edn. Washington: DC: American  
20  
21 Psychiatric Association; 2000.
- 22  
23  
24 19. Jacka FN, Pasco JA, Henry MJ, Kotowicz MA, Nicholson GC, Berk M: Dietary  
25  
26 omega-3 fatty acids and depression in a community sample. *Nutr Neurosci*  
27  
28 2004, **7**:101-106.
- 29  
30  
31 20. Burns A, Younger J, Morris J, Baldwin R, Tarrier N, Pendleton N, Cohen P,  
32  
33 Horan M, Banerjee S: Outcomes Following Hip Fracture Surgery: A 2-Year  
34  
35 Prospective Study. *Am J Geriatr Psychiatry* 2013.
- 36  
37  
38 21. Shyu YI, Cheng HS, Teng HC, Chen MC, Wu CC, Tsai WC: Older people with hip  
39  
40 fracture: depression in the postoperative first year. *J Adv Nurs* 2009,  
41  
42 **65**(12):2514-2522.
- 43  
44  
45 22. Bellelli G, Frisoni GB, Turco R, Trabucchi M: Depressive symptoms combined  
46  
47 with dementia affect 12-months survival in elderly patients after  
48  
49 rehabilitation post-hip fracture surgery. *Int J Geriatr Psychiatry* 2008,  
50  
51 **23**(10):1073-1077.
- 52  
53  
54 23. Holmes JD, House AO: Psychiatric illness in hip fracture. *Age Ageing* 2000,  
55  
56 **29**(6):537-546.
- 57  
58  
59  
60

- 1  
2  
3 24. Silverman SL, Shen W, Minshall ME, Xie S, Moses KH: Prevalence of  
4 depressive symptoms in postmenopausal women with low bone mineral  
5 density and/or prevalent vertebral fracture: results from the Multiple  
6 Outcomes of Raloxifene Evaluation (MORE) study. *J Rheumatol* 2007,  
7 **34**(1):140-144.  
8  
9  
10  
11  
12  
13  
14 25. Mossey JM, Knott K, Craik R: The effects of persistent depressive symptoms  
15 on hip fracture recovery. *J Gerontol* 1990, **45**(5):M163-168.  
16  
17  
18 26. Ostir GV, Goodwin JS, Markides KS, Ottenbacher KJ, Balfour J, Guralnik JM:  
19 Differential effects of premorbid physical and emotional health on recovery  
20 from acute events. *J Am Geriatr Soc* 2002, **50**(4):713-718.  
21  
22  
23  
24  
25  
26 27. Otmar R, Reventlow S, Morrow M, Nicholson G, Kotowicz M, Pasco J: A  
27 cultural models approach to osteoporosis prevention and treatment. *Sage*  
28 *Open* 2012:1-16.  
29  
30  
31  
32  
33 28. Stewart DE, Yuen T: A systematic review of resilience in the physically ill.  
34 *Psychosomatics* 2011, **52**(3):199-209.  
35  
36  
37  
38 29. Fava M, Kendler KS: Major depressive disorder. *Neuron* 2000, **28**(2):335-341.  
39  
40  
41  
42  
43  
44  
45  
46  
47  
48  
49  
50  
51  
52  
53  
54  
55  
56  
57  
58  
59  
60



Table 1: Characteristics of the fracture cases and controls according to age ( $\leq 65$ yr and  $> 65$  years). Values are given as median (interquartile range), mean ( $\pm$  standard deviation) or n (%).

|                                      | Fracture cases   | Controls         | p-values |
|--------------------------------------|------------------|------------------|----------|
| <b><math>\leq 65</math> years</b>    | <b>n = 170</b>   | <b>n = 382</b>   |          |
| <b>Age (yr)</b>                      | 54.0 (45.0-60.2) | 50.6 (43.2-58.5) | 0.019    |
| <b>Weight (kg)</b>                   | 69.1 (61.4-78.4) | 67.6 (60.1-79.0) | 0.386    |
| <b>Height (cm)</b>                   | 162.2 $\pm$ 6.5  | 161.9 $\pm$ 5.9  | 0.619    |
| <b>Depression (12-month)</b>         | 17 (10.0%)       | 60 (15.7%)       | 0.074    |
| <b>Physical activity (active)</b>    | 117 (79.6%)      | 275 (75.6%)      | 0.328    |
| <b>Alcohol consumption (current)</b> | 77 (52.4%)       | 198 (54.4%)      | 0.679    |
| <b>Smoking (current)</b>             | 20 (26.7%)       | 40 (11.0%)       | <0.001   |
| <b><math>&gt; 65</math> years</b>    | <b>n = 126</b>   | <b>n = 208</b>   |          |
| <b>Age (yr)</b>                      | 72.2 (69.2-76.4) | 74.1 (70.3-81.0) | 0.002    |
| <b>Weight (kg)</b>                   | 64.7 (57.0-70.6) | 63.7 (56.0-71.9) | 0.736    |
| <b>Height (cm)</b>                   | 157.21 $\pm$ 6.3 | 156.7 $\pm$ 6.4  | 0.502    |
| <b>Depression (12-month)</b>         | 12 (9.5%)        | 7 (3.4%)         | 0.019    |
| <b>Physical activity (active)</b>    | 48 (45.7%)       | 78 (50.0%)       | 0.497    |
| <b>Alcohol consumption (current)</b> | 40 (38.1%)       | 69 (44.2%)       | 0.324    |
| <b>Smoking (current)</b>             | 3 (5.3%)         | 3 (1.9%)         | 0.192    |

1  
2  
3  
4  
5  
6  
7  
8  
9  
10  
11  
12  
13  
14  
15  
16  
17  
18  
19  
20  
21  
22  
23  
24  
25  
26  
27  
28  
29  
30  
31  
32  
33  
34  
35  
36  
37  
38  
39  
40  
41  
42  
43  
44  
45  
46  
47  
48  
49  
50  
51  
52  
53  
54  
55  
56  
57  
58  
59  
60

For peer review only

## STROBE Statement—checklist of items that should be included in reports of observational studies

|                              | Item No | Recommendation                                                                                                                                                                                                                                                                                                                                                                                                                                                         |     |
|------------------------------|---------|------------------------------------------------------------------------------------------------------------------------------------------------------------------------------------------------------------------------------------------------------------------------------------------------------------------------------------------------------------------------------------------------------------------------------------------------------------------------|-----|
| <b>Title and abstract</b>    | 1       | (a) Indicate the study's design with a commonly used term in the title or the abstract                                                                                                                                                                                                                                                                                                                                                                                 | Y   |
|                              |         | (b) Provide in the abstract an informative and balanced summary of what was done and what was found                                                                                                                                                                                                                                                                                                                                                                    | Y   |
| <b>Introduction</b>          |         |                                                                                                                                                                                                                                                                                                                                                                                                                                                                        |     |
| Background/rationale         | 2       | Explain the scientific background and rationale for the investigation being reported                                                                                                                                                                                                                                                                                                                                                                                   | Y   |
| Objectives                   | 3       | State specific objectives, including any prespecified hypotheses                                                                                                                                                                                                                                                                                                                                                                                                       | Y   |
| <b>Methods</b>               |         |                                                                                                                                                                                                                                                                                                                                                                                                                                                                        |     |
| Study design                 | 4       | Present key elements of study design early in the paper                                                                                                                                                                                                                                                                                                                                                                                                                | Y   |
| Setting                      | 5       | Describe the setting, locations, and relevant dates, including periods of recruitment, exposure, follow-up, and data collection                                                                                                                                                                                                                                                                                                                                        | Y   |
| Participants                 | 6       | (a) <i>Cohort study</i> —Give the eligibility criteria, and the sources and methods of selection of participants. Describe methods of follow-up<br><i>Case-control study</i> —Give the eligibility criteria, and the sources and methods of case ascertainment and control selection. Give the rationale for the choice of cases and controls<br><i>Cross-sectional study</i> —Give the eligibility criteria, and the sources and methods of selection of participants | Y   |
|                              |         | (b) <i>Cohort study</i> —For matched studies, give matching criteria and number of exposed and unexposed<br><i>Case-control study</i> —For matched studies, give matching criteria and the number of controls per case                                                                                                                                                                                                                                                 | Y   |
| Variables                    | 7       | Clearly define all outcomes, exposures, predictors, potential confounders, and effect modifiers. Give diagnostic criteria, if applicable                                                                                                                                                                                                                                                                                                                               | Y   |
| Data sources/<br>measurement | 8*      | For each variable of interest, give sources of data and details of methods of assessment (measurement). Describe comparability of assessment methods if there is more than one group                                                                                                                                                                                                                                                                                   | Y   |
| Bias                         | 9       | Describe any efforts to address potential sources of bias                                                                                                                                                                                                                                                                                                                                                                                                              | N/A |
| Study size                   | 10      | Explain how the study size was arrived at                                                                                                                                                                                                                                                                                                                                                                                                                              | Y   |
| Quantitative variables       | 11      | Explain how quantitative variables were handled in the analyses. If applicable, describe which groupings were chosen and why                                                                                                                                                                                                                                                                                                                                           | Y   |
| Statistical methods          | 12      | (a) Describe all statistical methods, including those used to control for confounding                                                                                                                                                                                                                                                                                                                                                                                  | Y   |
|                              |         | (b) Describe any methods used to examine subgroups and interactions                                                                                                                                                                                                                                                                                                                                                                                                    | Y   |
|                              |         | (c) Explain how missing data were addressed                                                                                                                                                                                                                                                                                                                                                                                                                            | Y   |
|                              |         | (d) <i>Cohort study</i> —If applicable, explain how loss to follow-up was addressed<br><i>Case-control study</i> —If applicable, explain how matching of cases and controls was addressed<br><i>Cross-sectional study</i> —If applicable, describe analytical methods taking account of sampling strategy                                                                                                                                                              | Y   |
|                              |         | (e) Describe any sensitivity analyses                                                                                                                                                                                                                                                                                                                                                                                                                                  | N/A |

Continued on next page

| <b>Results</b>           |     |                                                                                                                                                                                                              |   |
|--------------------------|-----|--------------------------------------------------------------------------------------------------------------------------------------------------------------------------------------------------------------|---|
| Participants             | 13* | (a) Report numbers of individuals at each stage of study—eg numbers potentially eligible, examined for eligibility, confirmed eligible, included in the study, completing follow-up, and analysed            | Y |
|                          |     | (b) Give reasons for non-participation at each stage                                                                                                                                                         | Y |
|                          |     | (c) Consider use of a flow diagram                                                                                                                                                                           | N |
| Descriptive data         | 14* | (a) Give characteristics of study participants (eg demographic, clinical, social) and information on exposures and potential confounders                                                                     | Y |
|                          |     | (b) Indicate number of participants with missing data for each variable of interest                                                                                                                          | Y |
|                          |     | (c) <i>Cohort study</i> —Summarise follow-up time (eg, average and total amount)                                                                                                                             |   |
| Outcome data             | 15* | <i>Cohort study</i> —Report numbers of outcome events or summary measures over time                                                                                                                          |   |
|                          |     | <i>Case-control study</i> —Report numbers in each exposure category, or summary measures of exposure                                                                                                         | Y |
|                          |     | <i>Cross-sectional study</i> —Report numbers of outcome events or summary measures                                                                                                                           |   |
| Main results             | 16  | (a) Give unadjusted estimates and, if applicable, confounder-adjusted estimates and their precision (eg, 95% confidence interval). Make clear which confounders were adjusted for and why they were included | Y |
|                          |     | (b) Report category boundaries when continuous variables were categorized                                                                                                                                    |   |
|                          |     | (c) If relevant, consider translating estimates of relative risk into absolute risk for a meaningful time period                                                                                             |   |
| Other analyses           | 17  | Report other analyses done—eg analyses of subgroups and interactions, and sensitivity analyses                                                                                                               |   |
| <b>Discussion</b>        |     |                                                                                                                                                                                                              |   |
| Key results              | 18  | Summarise key results with reference to study objectives                                                                                                                                                     | Y |
| Limitations              | 19  | Discuss limitations of the study, taking into account sources of potential bias or imprecision. Discuss both direction and magnitude of any potential bias                                                   | Y |
| Interpretation           | 20  | Give a cautious overall interpretation of results considering objectives, limitations, multiplicity of analyses, results from similar studies, and other relevant evidence                                   | Y |
| Generalisability         | 21  | Discuss the generalisability (external validity) of the study results                                                                                                                                        | Y |
| <b>Other information</b> |     |                                                                                                                                                                                                              |   |
| Funding                  | 22  | Give the source of funding and the role of the funders for the present study and, if applicable, for the original study on which the present article is based                                                | Y |

\*Give information separately for cases and controls in case-control studies and, if applicable, for exposed and unexposed groups in cohort and cross-sectional studies.

**Note:** An Explanation and Elaboration article discusses each checklist item and gives methodological background and published examples of transparent reporting. The STROBE checklist is best used in conjunction with this article (freely available on the Web sites of PLoS Medicine at <http://www.plosmedicine.org/>, Annals of Internal Medicine at <http://www.annals.org/>, and Epidemiology at <http://www.epidem.com/>). Information on the STROBE Initiative is available at [www.strobe-statement.org](http://www.strobe-statement.org).

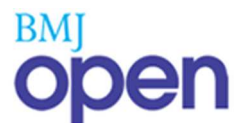

**DEPRESSION FOLLOWING FRACTURE IN WOMEN: A STUDY  
OF AGE-MATCHED COHORTS**

|                                    |                                                                                                                                                                                                                                                                  |
|------------------------------------|------------------------------------------------------------------------------------------------------------------------------------------------------------------------------------------------------------------------------------------------------------------|
| Journal:                           | <i>BMJ Open</i>                                                                                                                                                                                                                                                  |
| Manuscript ID:                     | bmjopen-2013-004226.R1                                                                                                                                                                                                                                           |
| Article Type:                      | Research                                                                                                                                                                                                                                                         |
| Date Submitted by the Author:      | 17-Dec-2013                                                                                                                                                                                                                                                      |
| Complete List of Authors:          | Williams, Lana; Deakin University,<br>Berk, Michael; Deakin University,<br>Henry, Margaret; Barwon Health,<br>Stuart, Amanda; Deakin University,<br>Brennan, Sharon; Deakin University,<br>Jacka, Felice; Deakin University,<br>Pasco, Julie; Deakin University, |
| <b>Primary Subject<br>Heading</b>: | Epidemiology                                                                                                                                                                                                                                                     |
| Secondary Subject Heading:         | Mental health                                                                                                                                                                                                                                                    |
| Keywords:                          | EPIDEMIOLOGY, GERIATRIC MEDICINE, Musculoskeletal disorders <<br>ORTHOPAEDIC & TRAUMA SURGERY, Adult psychiatry < PSYCHIATRY                                                                                                                                     |
|                                    |                                                                                                                                                                                                                                                                  |

SCHOLARONE™  
Manuscripts

1  
2  
3 **DEPRESSION FOLLOWING FRACTURE IN WOMEN: A STUDY OF AGE-MATCHED**  
4  
5 **COHORTS**  
6  
7  
8  
9

10 Running title: Depression following fracture in women  
11

12  
13  
14 Lana J Williams<sup>1,2</sup>: [lanaw@barwonhealth.org.au](mailto:lanaw@barwonhealth.org.au)  
15

16  
17 Michael Berk<sup>1,2,3,4</sup>: [mikebe@barwonhealth.org.au](mailto:mikebe@barwonhealth.org.au)  
18

19 Margaret J Henry<sup>5</sup>: [margh@barwonhealth.org.au](mailto:margh@barwonhealth.org.au)  
20

21 Amanda L Stuart<sup>1</sup>: [amandh@barwonhealth.org.au](mailto:amandh@barwonhealth.org.au)  
22

23 Sharon L Brennan<sup>1,6,7</sup>: [sharob@barwonhealthorg.au](mailto:sharob@barwonhealthorg.au)  
24

25 Felice N Jacka<sup>1,2</sup>: [felice@barwonhealth.org.au](mailto:felice@barwonhealth.org.au)  
26

27 Julie A Pasco<sup>1,6</sup>: [juliep@barwonhealth.org.au](mailto:juliep@barwonhealth.org.au)  
28  
29  
30  
31  
32

33 **Affiliations:**  
34

35  
36 <sup>1</sup> IMPACT Strategic Research Centre, School of Medicine, Deakin University, Geelong,  
37  
38 Australia  
39

40 <sup>2</sup> Department of Psychiatry, The University of Melbourne, Parkville, Australia  
41

42 <sup>3</sup> Orygen Youth Health Research Centre, Parkville, Australia  
43

44 <sup>4</sup> Florey Institute of Neuroscience and Mental Health, Parkville, Australia  
45

46 <sup>5</sup> Department of Medicine, Barwon Health, Deakin University  
47

48 <sup>6</sup> NorthWest Academic Centre, Department of Medicine, The University of  
49  
50 Melbourne, St Albans, Australia  
51

52 <sup>7</sup> Australian Institute for Musculoskeletal Science, Melbourne, Australia  
53  
54

55 **Corresponding author and contact for re-print requests:**  
56  
57  
58  
59  
60

1  
2  
3 Dr Lana Williams  
4

5 Deakin University  
6

7 School of Medicine  
8

9  
10 PO Box 281, Geelong 3220, Australia  
11

12 Tel: +61 3 4215 3303 Fax +61 3 4215 3491  
13

14 Email: lanaw@barwonhealth.org.au  
15

16  
17 **Word count:** 1842 words  
18

19 **Key Words:** Fracture; Depression; Psychiatric illness; Quality of Life; Osteoporosis  
20  
21  
22  
23  
24  
25  
26  
27  
28  
29  
30  
31  
32  
33  
34  
35  
36  
37  
38  
39  
40  
41  
42  
43  
44  
45  
46  
47  
48  
49  
50  
51  
52  
53  
54  
55  
56  
57  
58  
59  
60

**ABSTRACT**

**Objectives:** High levels of disability, functional impairment and mortality are independently associated with both fracture and depression, however the relationship between fracture and depression is uncertain. The aim of this study was to investigate whether fracture is associated with subsequent depressive symptoms in a population-based sample of women.

**Design:** A study of age-matched fracture vs. non fracture cohorts of women

**Setting:** Barwon Statistical Division, South Eastern Australia.

**Participants:** Two samples of women aged  $\geq 35$ yr were drawn from the Geelong Osteoporosis Study (GOS). The fracture cohort included women with incident fracture identified from radiology reports and the non-fracture cohort were randomly selected from the electoral roll during 1994-6.

**Outcome measure:** Symptoms of depression for women with and without fracture during the 12-month period 2000-1 were identified by self-report questionnaire based on Diagnostic and Statistical Manual of Mental Disorders, 4<sup>th</sup> Edition (DSM-IV) criteria.

**Results:** A total of 296 women with fracture (12 hip, 48 vertebral, 91 wrist/forearm, 17 upper arm, 7 pelvis, 11 rib, 62 lower leg and 48 other fractures) and 590 women without fracture were included. Associations between fracture and depression differed between younger ( $\leq 65$ yr) and older ( $> 65$ yr) women. Age and weight adjusted odds ratio for depression following fracture among younger women was 0.62 (0.35-1.11,  $p=0.12$ ) and 3.33 (1.24-8.98,  $p=0.02$ ) for older women. Further adjustment for lifestyle factors did not affect the results.



1  
2  
3 **Conclusions:** This study demonstrated that differences in mood status exist between  
4  
5 older and younger women following fracture and that fracture is associated with  
6  
7 increased depression in older women. Assessment of mood status in both the short  
8  
9 and long term following fracture in the elderly seems justified, with early detection  
10  
11 and treatment likely to result in improved outcomes.  
12  
13  
14  
15  
16  
17  
18  
19  
20  
21  
22  
23  
24  
25  
26  
27  
28  
29  
30  
31  
32  
33  
34  
35  
36  
37  
38  
39  
40  
41  
42  
43  
44  
45  
46  
47  
48  
49  
50  
51  
52  
53  
54  
55  
56  
57  
58  
59  
60

**STRENGTHS AND LIMITATIONS OF THIS STUDY**

- To our knowledge, there are no published studies investigating post fracture depression among the younger, fracture sites other than the hip, or studies with longer follow up periods; these are all strengths of the current study.
- The time lag between fracture and depression measurement, an inability to provide pre-event psychiatric status and the use of a self-report instrument to determine depression are limitations.

## BACKGROUND

Independently, depression and fracture are both increasingly prevalent public health concerns, particularly in women, and are associated with high levels of disability, functional impairment and early mortality. Depression is common and often persistent following a medical event, adversely affecting outcomes and prognosis by hindering adherence to treatment regimes and diminishing quality of life [1]. It is estimated that up to 20% of adults are affected by depression [2, 3], with over \$644 million per annum spent on health system costs in Australia alone [4].

As a function of an ageing population, fracture rates and the associated burden are projected to rise substantially [5, 6]. It has been estimated that the lifetime risk of fracture lies within the range of 40% to 50% in women and 13% to 22% in men [7]. In 2000, the estimated number of fragility fractures worldwide was 9.0 million, of which 1.6 million were hip, 1.7 million forearm, and 1.4 million clinical vertebral fractures, with 61.0% occurring in women [8].

Declines in quality of life are typical following a fracture, regardless of the site of fracture, and impose substantial medical and social costs [9]. Furthermore, poorer psychological health has also been observed, with the associated declines in physical functioning, physical disability, and a loss of independence associated with fracture [10-12]. A review investigating outcomes following hip fracture concluded that post injury depressive symptoms are common and a strong predictor of poor recovery in the elderly [11].

1  
2  
3  
4  
5 It is likely that a bi-directional relationship between depression and fracture exists.  
6  
7  
8 Recently, depression has been shown to precede fracture, possibly influenced by  
9  
10 medication use and biological and lifestyle factors dysregulated in depression [13].  
11  
12 Moreover, depression has been shown to be a common response to chronic medical  
13  
14 conditions that can, in turn, impact on symptom burden and treatment adherence  
15  
16 and increase the risk of complications [14]. Given the high prevalence of both  
17  
18 depression and fracture in women, as well as the previously reported associations  
19  
20 showing depression to precede fracture, the aim of this study was to investigate  
21  
22 whether fracture is associated with subsequent depressive symptoms in a study of  
23  
24 age-matched fracture vs. non-fracture cohorts. Understanding such an association is  
25  
26 important in providing integrated and effective treatment.  
27  
28  
29  
30  
31  
32  
33  
34  
35  
36  
37  
38  
39  
40  
41  
42  
43  
44  
45  
46  
47  
48  
49  
50  
51  
52  
53  
54  
55  
56  
57  
58  
59  
60

## METHODS

### Participants

This study included women participating in the Geelong Osteoporosis Study (GOS), who were recruited from the Barwon Statistical Division (BSD) situated in south-eastern Australia to investigate the epidemiology of osteoporosis and fracture [15]. All participants gave written, informed consent, and the study was approved by the Human Research Ethics Committee at Barwon Health.

### *Fracture cohort*

Women identified from radiological reports as having sustained an incident fracture between February 1994 to February 1996 ( $n = 1397$ ), living in the BSD at the time of recruitment and aged 35 years and older were invited to participate in the fracture cohort of the GOS [16]. The process of fracture ascertainment from radiological reports has previously been validated [17]. A total of 1082 women were eligible for participation, with 77.4% accepting initial involvement ( $n=832$ ). Those who participated in the 6-year follow up ( $n=439$ ) were sent a depression questionnaire, with a total of 296 returned (67%) and thus included in this study (median age 63.0yr, range 35-87yr).

### *Non-Fracture cohort*

Between 1994 and 1997 an age-stratified, random sample of women residing in the BSD was recruited from the Commonwealth electoral rolls. The initial group totalled 1494 women (median age 54yr, range 20-94yr), with a participation rate of 77.1% [18]. Those eligible to participate in the 6-year follow up (n=1275) were sent a depression questionnaire, with a total of 758 returned (60%). For this current study, 590 women aged 35 years and older (median age 59.3yr, range 35-91yr) were included.

### **Measurements**

#### **Outcome variable**

Symptoms of depression during the 12-month period 2000-1 were identified using a self-report questionnaire based on the Diagnostic and Statistical Manual of Mental Disorders, Fourth Edition (DSM-IV) criteria [19]. An episode of major depression was defined as a depressed mood state and a loss of interest and pleasure in usual activity lasting for at least a two-week period. In addition, the presence of at least four symptoms including weight change, sleep disturbance, psychomotor changes, fatigue, feelings of worthlessness, poor concentration, and suicidal ideation had to be evident, accompanied by diminished physical performance determined to be causing distress or impairment in at least one domain of work, social or personal

1  
2  
3 functioning. The Cronbach's alpha co-efficient for determining internal reliability of  
4  
5 the questionnaire was 0.895 [20].  
6  
7  
8  
9

### 10 **Exposure variables**

11  
12  
13  
14  
15 Body weight and height were measured to the nearest 0.1 kg and 0.1 cm,  
16  
17 respectively. Information on lifestyle and other health factors was obtained via self-  
18  
19 report questionnaire. Women were classed as physically active if they participated in  
20  
21 light to vigorous activity on a regular basis. Tobacco smoking was recognised if  
22  
23 practised currently, and alcohol use recognised if average consumption exceeded  
24  
25 two standard drinks per day.  
26  
27  
28  
29  
30

### 31 **Statistical Analyses**

32  
33  
34  
35  
36 Statistical analyses were completed using Minitab (Version 15; Minitab, State College  
37  
38 PA). Associations between fracture and depression differed for younger and older  
39  
40 women; thus all analyses were stratified by age ( $\leq 65$ yr and  $> 65$  years). Differences in  
41  
42 characteristics between those with fracture and those without fracture according to  
43  
44 age group were compared using t-tests for continuous parametric data, Mann-  
45  
46 Whitney for continuous non-parametric and chi-square analyses for categorical data.  
47  
48  
49 Logistic regression was used to determine the association between fracture and the  
50  
51 likelihood of depressive symptoms among the younger ( $\leq 65$ yr) and older ( $> 65$ )  
52  
53 women. Age, anthropometry, physical activity, smoking and alcohol use were tested  
54  
55  
56  
57  
58  
59  
60

1  
2  
3  
4  
5  
6  
7  
8  
9  
10  
11  
12  
13  
14  
15  
16  
17  
18  
19  
20  
21  
22  
23  
24  
25  
26  
27  
28  
29  
30  
31  
32  
33  
34  
35  
36  
37  
38  
39  
40  
41  
42  
43  
44  
45  
46  
47  
48  
49  
50  
51  
52  
53  
54  
55  
56  
57  
58  
59  
60

in the models as potential confounders and/or effect modifiers. Values of  $p < 0.05$  were considered as significant.

For peer review only



## RESULTS

A total of 296 women with fracture (12 hip, 48 vertebral, 92 wrist/forearm, 17 upper arm, 7 pelvis, 12 rib, 64 lower leg and 48 other fractures) and 590 women without fracture were included in the analyses. Characteristics of the women with fracture vs. those without fracture according to age are shown in Table 1.

### *Younger women ( $\leq 65$ years)*

Among the younger women (n=552), there were no differences in weight, height, depression, physical activity or alcohol consumption between those with and those without fracture, however women with fracture were older and more likely to smoke (Table 1).

The association between fracture and depression among younger women was not significant. The unadjusted odds of having depression following fracture was 0.60 (95% CI 0.34-1.06, p=0.08) compared to those without fracture. Adjustment for age and weight did not affect the relationship (OR=0.62, 95% CI 0.35-1.11, p=0.12), nor did further adjustment for height, physical activity, smoking and alcohol consumption.

1  
2  
3 *Older women (>65 years)*  
4  
5  
6  
7

8 Among the older women (n=334), no differences in weight, height, physical activity,  
9 alcohol or smoking status were evident between those without or without fracture;  
10 however women with fracture were younger and more likely to have depression  
11 (Table 1).  
12  
13  
14  
15  
16  
17  
18  
19

20 The odds of having depression following fracture was three times greater (OR 3.02,  
21 95% CI 1.16-7.89, p=0.02) for women with fracture compared to those without.  
22  
23 Adjusting for age and weight did not affect the relationship (OR=3.33, 95% CI 1.24-  
24 8.98, p=0.02), which was also sustained after further adjustment for height, physical  
25 activity, smoking and alcohol consumption.  
26  
27  
28  
29  
30  
31  
32  
33  
34  
35  
36  
37  
38  
39  
40  
41  
42  
43  
44  
45  
46  
47  
48  
49  
50  
51  
52  
53  
54  
55  
56  
57  
58  
59  
60

## DISCUSSION

The findings from this study indicate an association between fracture and depression, although only among older women. Those aged >65 years were up to three-times more likely to have depression post fracture, while this relationship was not evident for younger women ( $\leq 65$  years). These associations were independent of age, anthropometry, and lifestyle factors.

Our findings suggesting the risk of depression post fracture is increased among older women are consistent with findings from previous studies. Recently, several publications have explored health outcomes following hip fracture surgery and found depression to be common and to impact negatively on recovery up to two years post fracture [21-23]. A systematic review that investigated the prevalence of psychiatric illness in hip fracture patients found that the prevalence of depression following fracture ranged from 9% to 47% [24]; those rates being somewhat higher than community rates. Similarly, the prevalence of depressive symptoms in postmenopausal women with osteoporosis was reported to be greater for women who also had prevalent vertebral fractures compared to those without [25]. Both depressive symptoms following fracture and pre-injury mood state have been shown to be predictive of recovery in the elderly, while a failure to regain pre-injury functional and ability levels increases the possibility of persistent depressive symptomatology [10, 26]. In a prospective cohort study of 240 older participants, those who experienced high levels of depressive symptoms prior to a medical event (hip fracture, stroke and heart attack), had a poorer likelihood of recovery in

1  
2  
3 activities of daily living [27]. Lastly, a recent study using a cultural models approach  
4  
5 to understand how older women viewed osteoporosis reported that experiencing a  
6  
7 fracture coincided with the acknowledgement of 'getting older' [28], thus we may  
8  
9 expect a fracture to increase the likelihood of depression for some older women. It is  
10  
11 plausible that stigma may be associated with a fracture in older age [28], and thus  
12  
13 impact negatively on an older woman's self-identity. Taken in context, although a  
14  
15 lower prevalence of depression overall has been reported among older women [3],  
16  
17 the occurrence of a fracture may enhance the susceptibility to depression for a  
18  
19 variety of reasons.  
20  
21  
22  
23  
24  
25

26  
27 Our findings suggest no relationship between fracture and later depression among  
28  
29 younger women. It is plausible that the causal pathway to fracture may differ across  
30  
31 age groups, resulting in differing effects on psychological and physical outcomes. For  
32  
33 instance, an internal locus of control (the belief one can control one's own life), high  
34  
35 self-esteem, hope, acceptance, optimism, and a sense of mastery have all been  
36  
37 associated with resilience or the ability to maintain or regain mental health following  
38  
39 adversity [29]. Furthermore, differences in pre-morbid emotional and cognitive state  
40  
41 may have existed between the younger and older women prior to fracture. This is an  
42  
43 important factor, as high positive affect and motivation has been observed as  
44  
45 increasing the chances of returning to pre-morbid levels of functioning after a major  
46  
47 health event [27]. Lastly, compared to older women, younger women may have  
48  
49 more access to social networks on which they can draw on for support, be less likely  
50  
51 to remain homebound post-fracture, and be able to fulfil ongoing work and social  
52  
53 commitments during recovery [30-32].  
54  
55  
56  
57  
58  
59  
60

1  
2  
3 Some methodological issues should be considered when interpreting the study  
4  
5 findings. The time lag between fracture and depression measurement and an  
6  
7 inability to provide pre-event psychiatric status is a limitation and it has to be taken  
8  
9 into consideration that depression is a long-term, recurrent disorder in most  
10  
11 individuals [33]. Thus, it is likely that depression preceded fracture in at least some of  
12  
13 the women. The use of a self-report instrument, rather than a clinical diagnostic  
14  
15 interview must also be acknowledged, also sensitivity and specificity of this scale was  
16  
17 not determined. Response bias may also have influenced the findings, with higher  
18  
19 rates of psychopathology and other co-morbid conditions possibly present in the  
20  
21 population declining participation. Last, as with all observational studies, our results  
22  
23 could be biased by unrecognised confounders and may not be generalizable to other  
24  
25 populations of women, men, or those with other medical conditions. To our  
26  
27 knowledge, there are no published studies investigating post fracture depression  
28  
29 among the younger, fracture sites other than the hip, or studies with longer follow  
30  
31 up periods; these are all strengths of the current study.  
32  
33  
34  
35  
36  
37  
38  
39

## 40 **CONCLUSION**

41  
42  
43  
44  
45 In conclusion, this study demonstrated that differences in mood status exist between  
46  
47 older and younger women following fracture and that fracture is associated with  
48  
49 increased depression in older women. Assessment of mood status in both the short-  
50  
51 and long-term following fracture in the elderly seems justified, with early detection  
52  
53 and treatment of elevated levels of depression likely to result in improved outcomes.  
54  
55  
56  
57  
58  
59  
60

1  
2  
3  
4  
5  
6  
7  
8  
9  
10  
11  
12  
13  
14  
15  
16  
17  
18  
19  
20  
21  
22  
23  
24  
25  
26  
27  
28  
29  
30  
31  
32  
33  
34  
35  
36  
37  
38  
39  
40  
41  
42  
43  
44  
45  
46  
47  
48  
49  
50  
51  
52  
53  
54  
55  
56  
57  
58  
59  
60

Further research investigating a causal link between fracture and depression is warranted and is currently underway.

For peer review only

## FUNDING STATEMENTS

This work was supported by the National Health and Medical Research Council (NHMRC) of Australia. The funding providers played no role in the design or conduct of the study; collection, management, analysis, and interpretation of the data; or in preparation, review, or approval of the manuscript.

## AUTHORS' CONTRIBUTIONS

LJW took part in the conception and design of the study, data cleaning, statistical analysis, interpretation of the data and took primary responsibility for writing the manuscript. MB and SLB took part in the interpretation of data and critically revised the manuscript. MH and ALS took part in the conception and design of the study, statistical analysis, interpretation of the data and critically revised the manuscript. FNJ took part in the conception and design of the study, acquisition of the data and critically revised the manuscript. JAP took part in the conception and design of the study, interpretation of the analysis and critically revised the manuscript. All authors read and approved the final manuscript.

## COMPETING INTERESTS

Lana Williams has received Grant/Research support from Eli Lilly, Pfizer, The University of Melbourne, Deakin University and the NHMRC.

1  
2  
3 Michael Berk has received Grant/Research Support from the NIH, Simons  
4 Foundation, CRC for Mental Health, Stanley Medical Research Institute, MBF,  
5  
6  
7 NHMRC, Beyond Blue, Geelong Medical Research Foundation, Bristol Myers Squibb,  
8  
9  
10 Eli Lilly, Glaxo SmithKline, Organon, Novartis, Mayne Pharma, Servier and Astra  
11  
12 Zeneca. He has been a paid consultant for Astra Zeneca, Bristol Myers Squibb, Eli  
13  
14 Lilly, Glaxo SmithKline, Janssen Cilag, Lundbeck and Pfizer and a paid speaker for  
15  
16  
17 Astra Zeneca, Bristol Myers Squibb, Eli Lilly, Glaxo SmithKline, Janssen Cilag,  
18  
19  
20 Lundbeck, Organon, Pfizer, Sanofi Synthelabo, Solvay and Wyeth.  
21

22  
23  
24 Margaret Henry and Amanda Stuart have no conflicts of interest, including specific  
25  
26  
27 financial interests and relationships and affiliations relevant to the subject matter or  
28  
29  
30 materials discussed in the manuscript.  
31

32  
33  
34 Sharon Brennan has received Grant/Research support from The University of  
35  
36  
37 Melbourne, and the NHMRC.  
38

39  
40  
41 Felice Jacka has received Grant/Research support from the Brain and Behaviour  
42  
43  
44 Research Institute, NHMRC, Australian Rotary Health, Geelong Medical Research  
45  
46  
47 Foundation and The University of Melbourne, and has been a paid speaker for  
48  
49  
50 Sanofi-Synthelabo, Janssen Cilag, Servier, Pfizer, Network Nutrition, Health Ed and Eli  
51  
52  
53 Lilly.  
54

55  
56  
57 Julie Pasco has received speaker fees from Amgen, Eli Lilly and Sanofi-Aventis and  
58  
59  
60 funding from the Geelong Region Medical Research Foundation, Barwon Health,



1  
2  
3 Perpetual Trustees, the Dairy Research and Development Corporation, The  
4  
5 University of Melbourne, the Ronald Geoffrey Arnott Foundation, ANZ Charitable  
6  
7 Trust, the American Society for Bone and Mineral Research, Amgen (Europe) GmbH  
8  
9  
10 and the NHMRC.

11  
12 **Data Sharing Statement**

13  
14 No additional data  
15  
16  
17  
18  
19  
20  
21  
22  
23  
24  
25  
26  
27  
28  
29  
30  
31  
32  
33  
34  
35  
36  
37  
38  
39  
40  
41  
42  
43  
44  
45  
46  
47  
48  
49  
50  
51  
52  
53  
54  
55  
56  
57  
58  
59  
60

## REFERENCES

1. Lenze EJ, Rogers JC, Martire LM, al. **The association of late-life depression and anxiety with physical disability: a review of the literature and prospectus for future research.** *Am J Geriatr Psychiatry* 2001, **9**(2):113-135.
2. Kessler RC, Angermeyer M, Anthony JC, et al. **Lifetime prevalence and age-of-onset distributions of mental disorders in the World Health Organization's World Mental Health Survey Initiative.** *World Psychiatry* 2007, **6**(3):168-176.
3. Williams L, Jacka F, Pasco J, et al. **The prevalence of mood and anxiety disorders in Australian women.** *Australas Psychiatry* 2010, **18**(3):250-255.
4. Mathers C, Vos T, Stevenson C: **The burden of disease and injury in Australia.** In.: Australian Institute of Health and Welfare; 1999.
5. Gullberg B, Johnell O, Kanis JA: **World-wide projections for hip fracture.** *Osteoporos Int* 1997, **7**(5):407-413.
6. Sanders KM, Nicholson GC, Ugoni AM, et al/ **Health burden of hip and other fractures in Australia beyond 2000. Projections based on the Geelong Osteoporosis Study.** *Med J Aust* 1999, **170**(10):467-470.
7. Dennison E, Mohamed MA, Cooper C: **Epidemiology of osteoporosis.** *Rheum Dis Clin North Am* 2006, **32**(4):617-629.
8. Johnell O, Kanis JA: **An estimate of the worldwide prevalence and disability associated with osteoporotic fractures.** *Osteoporos Int* 2006, **17**(12):1726-1733.
9. Pasco JA, Sanders KM, Hoekstra FM, et al. **The human cost of fracture.** *Osteoporos Int* 2005, **16**(12):2046-2052.
10. Lenze EJ, Munin MC, Dew MA, et al. **Adverse effects of depression and cognitive impairment on rehabilitation participation and recovery from hip fracture.** *Int J Geriatr Psychiatry* 2004, **19**(5):472-478.
11. Holmes J, House A: **Psychiatric illness predicts poor outcome after surgery for hip fracture: a prospective cohort study.** *Psychol Med* 2000, **30**(4):921-929.

12. Magaziner J, Simonsick EM, Kashner TM, et al. **Predictors of functional recovery one year following hospital discharge for hip fracture: a prospective study.** *J Gerontol* 1990, **45**(3):M101-107.
13. Wu Q, Liu J, Gallegos-Orozco JF, et al. **Depression, fracture risk, and bone loss: a meta-analysis of cohort studies.** *Osteoporos Int* 2010, **21**(10):1627-1635.
14. Sanna L, Stuart AL, Pasco JA, et al. **Physical comorbidities in men with mood and anxiety disorders: a population-based study.** *BMC Med* 2013, **11**:110.
15. Pasco J, Nicholson G, Kotowicz M: **Cohort profile: Geelong Osteoporosis Study.** *Int J Epidemiol* 2011:1-11.
16. Sanders KM, Seeman E, Ugoni AM, et al. **Age- and gender-specific rate of fractures in Australia: a population-based study.** *Osteoporos Int* 1999, **10**(3):240-247.
17. Pasco JA, Henry MJ, Gaudry TM, et al. **Identification of incident fractures: the Geelong Osteoporosis Study.** *Aust N Z J Med* 1999, **29**(2):203-206.
18. Henry MJ, Pasco JA, Nicholson GC, et al. **Prevalence of osteoporosis in Australian women: Geelong Osteoporosis Study.** *J Clin Densitom* 2000, **3**(3):261-268.
19. Association AP: **Diagnostic and Statistical Manual of Mental Disorders**, 4th Edition, Text Revision edn. Washington: DC: American Psychiatric Association; 2000.
20. Jacka FN, Pasco JA, Henry MJ, et al. **Dietary omega-3 fatty acids and depression in a community sample.** *Nutr Neurosci* 2004, **7**:101-106.
21. Burns A, Younger J, Morris J, et al: **Outcomes Following Hip Fracture Surgery: A 2-Year Prospective Study.** *Am J Geriatr Psychiatry* 2013.
22. Weng TY, Chen LC, Shyu HW, et al: **Lactoferrin inhibits enterovirus 71 infection by binding to VP1 protein and host cells.** *Antiviral Res* 2005, **67**(1):31-37.
23. Bellelli G, Frisoni GB, Turco R, et al: **Depressive symptoms combined with dementia affect 12-months survival in elderly patients after rehabilitation post-hip fracture surgery.** *Int J Geriatr Psychiatry* 2008, **23**(10):1073-1077.

- 1
- 2
- 3 24. Holmes JD, House AO: **Psychiatric illness in hip fracture**. *Age Ageing* 2000,
- 4 **29(6):537-546**.
- 5
- 6 25. Silverman SL, Shen W, Minshall ME, et al: **Prevalence of depressive**
- 7 **symptoms in postmenopausal women with low bone mineral density**
- 8 **and/or prevalent vertebral fracture: results from the Multiple Outcomes of**
- 9 **Raloxifene Evaluation (MORE) study**. *J Rheumatol* 2007, **34(1):140-144**.
- 10
- 11 26. Mossey JM, Knott K, Craik R: **The effects of persistent depressive symptoms**
- 12 **on hip fracture recovery**. *J Gerontol* 1990, **45(5):M163-168**.
- 13
- 14 27. Ostir GV, Goodwin JS, Markides KS, et al: **Differential effects of premorbid**
- 15 **physical and emotional health on recovery from acute events**. *J Am Geriatr*
- 16 *Soc* 2002, **50(4):713-718**.
- 17
- 18 28. Otmar R, Reventlow S, Morrow M, et al: **A cultural models approach to**
- 19 **osteoporosis prevention and treatment**. *Sage Open* 2012:1-16.
- 20
- 21 29. Stewart DE, Yuen T: **A systematic review of resilience in the physically ill**.
- 22 *Psychosomatics* 2011, **52(3):199-209**.
- 23
- 24 30. Kawachi I, Berkman M (ed.): **Social epidemiology**. New York: Oxford University Press;
- 25 2000.
- 26
- 27 31. Subramanian S, Lochner K, Kawachi I: **Neighbourhood differences in social**
- 28 **capital: a compositional artifact or a contextual construct?** . *Health Place*
- 29 2003, **9:33-44**.
- 30
- 31 32. Diez Roux AV: **Estimating neighborhood health effects: the challenges of**
- 32 **causal inference in a complex world**. *Soc Sci Med* 2004, **58(10):1953-1960**.
- 33
- 34 33. Fava M, Kendler KS: **Major depressive disorder**. *Neuron* 2000, **28(2):335-341**.
- 35
- 36
- 37
- 38
- 39
- 40
- 41
- 42
- 43
- 44
- 45
- 46
- 47
- 48
- 49
- 50
- 51
- 52
- 53
- 54
- 55
- 56
- 57
- 58
- 59
- 60

Table 1: Characteristics of the fracture vs. non-fracture cohorts according to age ( $\leq 65$ yr and  $>65$  years). Values are given as median (interquartile range), mean ( $\pm$  standard deviation) or n (%).

|                                   | Women with fracture | Women with no fracture | p-values |
|-----------------------------------|---------------------|------------------------|----------|
| <b><math>\leq 65</math> years</b> | <b>n = 170</b>      | <b>n = 382</b>         |          |
| Age (yr)                          | 54.0 (45.0-60.2)    | 50.6 (43.2-58.5)       | 0.019    |
| Weight (kg)                       | 69.1 (61.4-78.4)    | 67.6 (60.1-79.0)       | 0.386    |
| Height (cm)                       | 162.2 $\pm$ 6.5     | 161.9 $\pm$ 5.9        | 0.619    |
| Depression (12-month)             | 17 (10.0%)          | 60 (15.7%)             | 0.074    |
| Physical activity (active)        | 117 (79.6%)         | 275 (75.6%)            | 0.328    |
| Alcohol consumption (current)     | 77 (52.4%)          | 198 (54.4%)            | 0.679    |
| Smoking (current)                 | 20 (26.7%)          | 40 (11.0%)             | <0.001   |
| <b><math>&gt;65</math> years</b>  | <b>n = 126</b>      | <b>n = 208</b>         |          |
| Age (yr)                          | 72.2 (69.2-76.4)    | 74.1 (70.3-81.0)       | 0.002    |
| Weight (kg)                       | 64.7 (57.0-70.6)    | 63.7 (56.0-71.9)       | 0.736    |
| Height (cm)                       | 157.21 $\pm$ 6.3    | 156.7 $\pm$ 6.4        | 0.502    |
| Depression (12-month)             | 12 (9.5%)           | 7 (3.4%)               | 0.019    |
| Physical activity (active)        | 48 (45.7%)          | 78 (50.0%)             | 0.497    |
| Alcohol consumption (current)     | 40 (38.1%)          | 69 (44.2%)             | 0.324    |
| Smoking (current)                 | 3 (5.3%)            | 3 (1.9%)               | 0.192    |

1  
2  
3  
4  
5  
6  
7  
8  
9  
10  
11  
12  
13  
14  
15  
16  
17  
18  
19  
20  
21  
22  
23  
24  
25  
26  
27  
28  
29  
30  
31  
32  
33  
34  
35  
36  
37  
38  
39  
40  
41  
42  
43  
44  
45  
46  
47  
48  
49  
50  
51  
52  
53  
54  
55  
56  
57  
58  
59  
60

For peer review only

1  
2  
3 **DEPRESSION FOLLOWING FRACTURE IN WOMEN: A STUDY OF AGE-MATCHED**  
4  
5 **COHORTS**  
6  
7  
8  
9

10 Running title: Depression following fracture in women  
11

12  
13  
14 Lana J Williams<sup>1,2</sup>: [lanaw@barwonhealth.org.au](mailto:lanaw@barwonhealth.org.au)  
15

16  
17 Michael Berk<sup>1,2,3,4</sup>: [mikebe@barwonhealth.org.au](mailto:mikebe@barwonhealth.org.au)  
18

19 Margaret J Henry<sup>5</sup>: [margh@barwonhealth.org.au](mailto:margh@barwonhealth.org.au)  
20

21 Amanda L Stuart<sup>1</sup>: [amandh@barwonhealth.org.au](mailto:amandh@barwonhealth.org.au)  
22

23 Sharon L Brennan<sup>1,6,7</sup>: [sharob@barwonhealthorg.au](mailto:sharob@barwonhealthorg.au)  
24

25 Felice N Jacka<sup>1,2</sup>: [felice@barwonhealth.org.au](mailto:felice@barwonhealth.org.au)  
26

27 Julie A Pasco<sup>1,6</sup>: [juliep@barwonhealth.org.au](mailto:juliep@barwonhealth.org.au)  
28  
29  
30  
31  
32

33 **Word count:** 1842 words  
34  
35  
36  
37

38 **Affiliations:**  
39

40 <sup>1</sup> IMPACT Strategic Research Centre, School of Medicine, Deakin University, Geelong,  
41  
42 Australia  
43

44 <sup>2</sup> Department of Psychiatry, The University of Melbourne, Parkville, Australia  
45

46 <sup>3</sup> Orygen Youth Health Research Centre, Parkville, Australia  
47

48 <sup>4</sup> Florey Institute of Neuroscience and Mental Health, Parkville, Australia  
49

50 <sup>5</sup> Department of Medicine, Barwon Health, Deakin University  
51

52 <sup>6</sup> NorthWest Academic Centre, Department of Medicine, The University of  
53  
54 Melbourne, St Albans, Australia  
55  
56  
57  
58  
59  
60

<sup>7</sup>Australian Institute for Musculoskeletal Science, Melbourne, Australia

**Corresponding author and contact for re-print requests:**

Dr Lana Williams

Deakin University

School of Medicine

PO Box 281, Geelong 3220, Australia

Tel: +61 3 4215 3303 Fax +61 3 4215 3491

Email: lanaw@barwonhealth.org.au



**ABSTRACT**

**Objectives:** High levels of disability, functional impairment and mortality are independently associated with both fracture and depression, however the relationship between fracture and depression is uncertain. The aim of this study was to investigate whether fracture is associated with subsequent depressive symptoms in a population-based sample of women.

**Design:** A study of age-matched fracture vs. non fracture cohorts of women

**Setting:** Barwon Statistical Division, South Eastern Australia.

**Participants:** Two samples of women aged  $\geq 35$ yr were drawn from the Geelong Osteoporosis Study (GOS). The fracture cohort included women with incident fracture identified from radiology reports and the non-fracture cohort were randomly selected from the electoral roll during 1994-6.

**Outcome measure:** Symptoms of depression for women with and without fracture during the 12-month period 2000-1 were identified by self-report questionnaire based on Diagnostic and Statistical Manual of Mental Disorders, 4<sup>th</sup> Edition (DSM-IV) criteria.

**Results:** A total of 296 women with fracture (12 hip, 48 vertebral, 91 wrist/forearm, 17 upper arm, 7 pelvis, 11 rib, 62 lower leg and 48 other fractures) and 590 women without fracture were included. Associations between fracture and depression differed between younger ( $\leq 65$ yr) and older ( $> 65$ yr) women. Age and weight adjusted odds ratio for depression following fracture among younger women was 0.62 (0.35-1.11,  $p=0.12$ ) and 3.33 (1.24-8.98,  $p=0.02$ ) for older women. Further adjustment for lifestyle factors did not affect the results.

1  
2  
3 **Conclusions:** This study demonstrated that differences in mood status exist between  
4  
5 older and younger women following fracture and that fracture is associated with  
6  
7 increased depression in older women. Assessment of mood status in both the short  
8  
9 and long term following fracture in the elderly seems justified, with early detection  
10  
11 and treatment likely to result in improved outcomes.  
12  
13

14  
15  
16  
17 **Key Words:** Fracture; Depression; Psychiatric illness; Quality of Life; Osteoporosis  
18  
19  
20  
21  
22  
23  
24  
25  
26  
27  
28  
29  
30  
31  
32  
33  
34  
35  
36  
37  
38  
39  
40  
41  
42  
43  
44  
45  
46  
47  
48  
49  
50  
51  
52  
53  
54  
55  
56  
57  
58  
59  
60

### STRENGTHS AND LIMITATIONS OF THIS STUDY

- To our knowledge, there are no published studies investigating post fracture depression among the younger, fracture sites other than the hip, or studies with longer follow up periods; these are all strengths of the current study.
- The time lag between fracture and depression measurement, an inability to provide pre-event psychiatric status and the use of a self-report instrument to determine depression are limitations.

## BACKGROUND

Independently, depression and fracture are both increasingly prevalent public health concerns, particularly in women, and are associated with high levels of disability, functional impairment and early mortality. Depression is common and often persistent following a medical event, adversely affecting outcomes and prognosis by hindering adherence to treatment regimes and diminishing quality of life [1]. It is estimated that up to 20% of adults are affected by depression [2, 3], with over \$644 million per annum spent on health system costs in Australia alone [4].

As a function of an ageing population, fracture rates and the associated burden are projected to rise substantially [5, 6]. It has been estimated that the lifetime risk of fracture lies within the range of 40% to 50% in women and 13% to 22% in men [7]. In 2000, the estimated number of fragility fractures worldwide was 9.0 million, of which 1.6 million were hip, 1.7 million forearm, and 1.4 million clinical vertebral fractures, with 61.0% occurring in women [8].

Declines in quality of life are typical following a fracture, regardless of the site of fracture, and impose substantial medical and social costs [9]. Furthermore, poorer psychological health has also been observed, with the associated declines in physical functioning, physical disability, and a loss of independence associated with fracture [10-12]. A review investigating outcomes following hip fracture concluded that post injury depressive symptoms are common and a strong predictor of poor recovery in the elderly [11].

1  
2  
3  
4  
5 It is likely that a bi-directional relationship between depression and fracture exists.  
6  
7  
8 Recently, depression has been shown to precede fracture, possibly influenced by  
9  
10 medication use and biological and lifestyle factors dysregulated in depression [13].  
11  
12 Moreover, depression has been shown to be a common response to chronic medical  
13  
14 conditions that can, in turn, impact on symptom burden and treatment adherence  
15  
16 and increase the risk of complications [14]. Given the high prevalence of both  
17  
18 depression and fracture in women, as well as the previously reported associations  
19  
20 showing depression to precede fracture, the aim of this study was to investigate  
21  
22 whether fracture is associated with subsequent depressive symptoms in a study of  
23  
24 age-matched fracture vs. non-fracture cohorts. Understanding such an association is  
25  
26 important in providing integrated and effective treatment.  
27  
28  
29  
30  
31  
32  
33  
34  
35  
36  
37  
38  
39  
40  
41  
42  
43  
44  
45  
46  
47  
48  
49  
50  
51  
52  
53  
54  
55  
56  
57  
58  
59  
60

## METHODS

### Participants

This study included women participating in the Geelong Osteoporosis Study (GOS), who were recruited from the Barwon Statistical Division (BSD) situated in south-eastern Australia to investigate the epidemiology of osteoporosis and fracture [15]. All participants gave written, informed consent, and the study was approved by the Human Research Ethics Committee at Barwon Health.

### Fracture cohort

Women identified from radiological reports as having sustained an incident fracture between February 1994 to February 1996 ( $n = 1397$ ), living in the BSD at the time of recruitment and aged 35 years and older were invited to participate in the fracture cohort of the GOS [16]. The process of fracture ascertainment from radiological reports has previously been validated [17]. A total of 1082 women were eligible for participation, with 77.4% accepting initial involvement ( $n=832$ ). Those who participated in the 6-year follow up ( $n=439$ ) were sent a depression questionnaire, with a total of 296 returned (67%) and thus included in this study (median age 63.0yr, range 35-87yr).

### Non-Fracture cohort

Between 1994 and 1997 an age-stratified, random sample of women residing in the BSD was recruited from the Commonwealth electoral rolls. The initial group totalled 1494 women (median age 54yr, range 20-94yr), with a participation rate of 77.1% [18]. Those eligible to participate in the 6-year follow up (n=1275) were sent a depression questionnaire, with a total of 758 returned (60%). For this current study, 590 women aged 35 years and older (median age 59.3yr, range 35-91yr) were included.

### Measurements

#### Outcome variable

Symptoms of depression during the 12-month period 2000-1 were identified using a self-report questionnaire based on the Diagnostic and Statistical Manual of Mental Disorders, Fourth Edition (DSM-IV) criteria [19]. An episode of major depression was defined as a depressed mood state and a loss of interest and pleasure in usual activity lasting for at least a two-week period. In addition, the presence of at least four symptoms including weight change, sleep disturbance, psychomotor changes, fatigue, feelings of worthlessness, poor concentration, and suicidal ideation had to be evident, accompanied by diminished physical performance determined to be causing distress or impairment in at least one domain of work, social or personal

1  
2  
3 functioning. The Cronbach's alpha co-efficient for determining internal reliability of  
4  
5 the questionnaire was 0.895 [20].  
6  
7  
8  
9

### 10 **Exposure variables**

11  
12  
13  
14  
15 Body weight and height were measured to the nearest 0.1 kg and 0.1 cm,  
16  
17 respectively. Information on lifestyle and other health factors was obtained via self-  
18  
19 report questionnaire. Women were classed as physically active if they participated in  
20  
21 light to vigorous activity on a regular basis. Tobacco smoking was recognised if  
22  
23 practised currently, and alcohol use recognised if average consumption exceeded  
24  
25 two standard drinks per day.  
26  
27  
28  
29  
30

### 31 **Statistical Analyses**

32  
33  
34  
35  
36 Statistical analyses were completed using Minitab (Version 15; Minitab, State College  
37  
38 PA). Associations between fracture and depression differed for younger and older  
39  
40 women; thus all analyses were stratified by age ( $\leq 65$ yr and  $> 65$  years). Differences in  
41  
42 characteristics between those with fracture and those without fracture according to  
43  
44 age group were compared using t-tests for continuous parametric data, Mann-  
45  
46 Whitney for continuous non-parametric and chi-square analyses for categorical data.  
47  
48  
49  
50 Logistic regression was used to determine the association between fracture and the  
51  
52 likelihood of depressive symptoms among the younger ( $\leq 65$ yr) and older ( $> 65$ )  
53  
54 women. Age, anthropometry, physical activity, smoking and alcohol use were tested  
55  
56  
57  
58  
59  
60



1  
2  
3 in the models as potential confounders and/or effect modifiers. Values of  $p < 0.05$   
4  
5 were considered as significant.  
6  
7  
8  
9  
10  
11  
12  
13  
14  
15  
16  
17  
18  
19  
20  
21  
22  
23  
24  
25  
26  
27  
28  
29  
30  
31  
32  
33  
34  
35  
36  
37  
38  
39  
40  
41  
42  
43  
44  
45  
46  
47  
48  
49  
50  
51  
52  
53  
54  
55  
56  
57  
58  
59  
60

For peer review only

## RESULTS

A total of 296 women with fracture (12 hip, 48 vertebral, 92 wrist/forearm, 17 upper arm, 7 pelvis, 12 rib, 64 lower leg and 48 other fractures) and 590 women without fracture were included in the analyses. Characteristics of the women with fracture vs. those without fracture according to age are shown in Table 1.

### *Younger women ( $\leq 65$ years)*

Among the younger women (n=552), there were no differences in weight, height, depression, physical activity or alcohol consumption between those with and those without fracture, however women with fracture were older and more likely to smoke (Table 1).

The association between fracture and depression among younger women was not significant. The unadjusted odds of having depression following fracture was 0.60 (95% CI 0.34-1.06, p=0.08) compared to those without fracture. Adjustment for age and weight did not affect the relationship (OR=0.62, 95% CI 0.35-1.11, p=0.12), nor did further adjustment for height, physical activity, smoking and alcohol consumption.

1  
2  
3 *Older women (>65 years)*  
4  
5  
6

7  
8 Among the older women (n=334), no differences in weight, height, physical activity,  
9 alcohol or smoking status were evident between those without or without fracture;  
10 however women with fracture were younger and more likely to have depression  
11 (Table 1).  
12  
13  
14  
15  
16  
17  
18  
19

20 The odds of having depression following fracture was three times greater (OR 3.02,  
21 95% CI 1.16-7.89, p=0.02) for women with fracture compared to those without.  
22  
23 Adjusting for age and weight did not affect the relationship (OR=3.33, 95% CI 1.24-  
24 8.98, p=0.02), which was also sustained after further adjustment for height, physical  
25 activity, smoking and alcohol consumption.  
26  
27  
28  
29  
30  
31  
32  
33  
34  
35  
36  
37  
38  
39  
40  
41  
42  
43  
44  
45  
46  
47  
48  
49  
50  
51  
52  
53  
54  
55  
56  
57  
58  
59  
60

## DISCUSSION

The findings from this study indicate an association between fracture and depression, although only among older women. Those aged >65 years were up to three-times more likely to have depression post fracture, while this relationship was not evident for younger women ( $\leq 65$  years). These associations were independent of age, anthropometry, and lifestyle factors.

Our findings suggesting the risk of depression post fracture is increased among older women are consistent with findings from previous studies. Recently, several publications have explored health outcomes following hip fracture surgery and found depression to be common and to impact negatively on recovery up to two years post fracture [21-23]. A systematic review that investigated the prevalence of psychiatric illness in hip fracture patients found that the prevalence of depression following fracture ranged from 9% to 47% [24]; those rates being somewhat higher than community rates. Similarly, the prevalence of depressive symptoms in postmenopausal women with osteoporosis was reported to be greater for women who also had prevalent vertebral fractures compared to those without [25]. Both depressive symptoms following fracture and pre-injury mood state have been shown to be predictive of recovery in the elderly, while a failure to regain pre-injury functional and ability levels increases the possibility of persistent depressive symptomatology [10, 26]. In a prospective cohort study of 240 older participants, those who experienced high levels of depressive symptoms prior to a medical event (hip fracture, stroke and heart attack), had a poorer likelihood of recovery in

1  
2  
3 activities of daily living [27]. Lastly, a recent study using a cultural models approach  
4  
5 to understand how older women viewed osteoporosis reported that experiencing a  
6  
7 fracture coincided with the acknowledgement of 'getting older' [28], thus we may  
8  
9 expect a fracture to increase the likelihood of depression for some older women. It is  
10  
11 plausible that stigma may be associated with a fracture in older age [28], and thus  
12  
13 impact negatively on an older woman's self-identity. Taken in context, although a  
14  
15 lower prevalence of depression overall has been reported among older women [3],  
16  
17 the occurrence of a fracture may enhance the susceptibility to depression for a  
18  
19 variety of reasons.  
20  
21  
22  
23

24  
25  
26 Our findings suggest no relationship between fracture and later depression among  
27  
28 younger women. It is plausible that the causal pathway to fracture may differ across  
29  
30 age groups, resulting in differing effects on psychological and physical outcomes. For  
31  
32 instance, an internal locus of control (the belief one can control one's own life), high  
33  
34 self-esteem, hope, acceptance, optimism, and a sense of mastery have all been  
35  
36 associated with resilience or the ability to maintain or regain mental health following  
37  
38 adversity [29]. Furthermore, differences in pre-morbid emotional and cognitive state  
39  
40 may have existed between the younger and older women prior to fracture. This is an  
41  
42 important factor, as high positive affect and motivation has been observed as  
43  
44 increasing the chances of returning to pre-morbid levels of functioning after a major  
45  
46 health event [27]. Lastly, compared to older women, younger women may have  
47  
48 more access to social networks on which they can draw on for support, be less likely  
49  
50 to remain homebound post-fracture, and be able to fulfil ongoing work and social  
51  
52 commitments during recovery [30-32].  
53  
54  
55  
56  
57  
58  
59  
60

1  
2  
3 Some methodological issues should be considered when interpreting the study  
4  
5 findings. The time lag between fracture and depression measurement and an  
6  
7 inability to provide pre-event psychiatric status is a limitation and it has to be taken  
8  
9 into consideration that depression is a long-term, recurrent disorder in most  
10  
11 individuals [33]. Thus, it is likely that depression preceded fracture in at least some of  
12  
13 the women. The use of a self-report instrument, rather than a clinical diagnostic  
14  
15 interview must also be acknowledged, also sensitivity and specificity of this scale was  
16  
17 not determined. Response bias may also have influenced the findings, with higher  
18  
19 rates of psychopathology and other co-morbid conditions possibly present in the  
20  
21 population declining participation. Last, as with all observational studies, our results  
22  
23 could be biased by unrecognised confounders and may not be generalizable to other  
24  
25 populations of women, men, or those with other medical conditions. To our  
26  
27 knowledge, there are no published studies investigating post fracture depression  
28  
29 among the younger, fracture sites other than the hip, or studies with longer follow  
30  
31 up periods; these are all strengths of the current study.  
32  
33  
34  
35  
36  
37  
38  
39

## 40 CONCLUSION

41  
42  
43  
44  
45 In conclusion, this study demonstrated that differences in mood status exist between  
46  
47 older and younger women following fracture and that fracture is associated with  
48  
49 increased depression in older women. Assessment of mood status in both the short-  
50  
51 and long-term following fracture in the elderly seems justified, with early detection  
52  
53 and treatment of elevated levels of depression likely to result in improved outcomes.  
54  
55  
56  
57  
58  
59  
60

1  
2  
3 Further research investigating a causal link between fracture and depression is  
4  
5 warranted and is currently underway.  
6  
7  
8  
9  
10  
11  
12  
13  
14  
15  
16  
17  
18  
19  
20  
21  
22  
23  
24  
25  
26  
27  
28  
29  
30  
31  
32  
33  
34  
35  
36  
37  
38  
39  
40  
41  
42  
43  
44  
45  
46  
47  
48  
49  
50  
51  
52  
53  
54  
55  
56  
57  
58  
59  
60

For peer review only

**FUNDING STATEMENTS**

This work was supported by the National Health and Medical Research Council (NHMRC) of Australia. The funding providers played no role in the design or conduct of the study; collection, management, analysis, and interpretation of the data; or in preparation, review, or approval of the manuscript.

**COMPETING INTERESTS**

Lana Williams has received Grant/Research support from Eli Lilly, Pfizer, The University of Melbourne, Deakin University and the NHMRC.

Michael Berk has received Grant/Research Support from the NIH, Simons Foundation, CRC for Mental Health, Stanley Medical Research Institute, MBF, NHMRC, Beyond Blue, Geelong Medical Research Foundation, Bristol Myers Squibb, Eli Lilly, Glaxo SmithKline, Organon, Novartis, Mayne Pharma, Servier and Astra Zeneca. He has been a paid consultant for Astra Zeneca, Bristol Myers Squibb, Eli Lilly, Glaxo SmithKline, Janssen Cilag, Lundbeck and Pfizer and a paid speaker for Astra Zeneca, Bristol Myers Squibb, Eli Lilly, Glaxo SmithKline, Janssen Cilag, Lundbeck, Organon, Pfizer, Sanofi Synthelabo, Solvay and Wyeth.

Margaret Henry and Amanda Stuart have no conflicts of interest, including specific financial interests and relationships and affiliations relevant to the subject matter or materials discussed in the manuscript.



1  
2  
3  
4  
5 Sharon Brennan has received Grant/Research support from The University of  
6  
7 Melbourne, and the NHMRC.  
8  
9

10  
11  
12 Felice Jacka has received Grant/Research support from the Brain and Behaviour  
13  
14 Research Institute, NHMRC, Australian Rotary Health, Geelong Medical Research  
15  
16 Foundation and The University of Melbourne, and has been a paid speaker for  
17  
18 Sanofi-Synthelabo, Janssen Cilag, Servier, Pfizer, Network Nutrition, Health Ed and Eli  
19  
20 Lilly.  
21  
22  
23

24  
25  
26 Julie Pasco has received speaker fees from Amgen, Eli Lilly and Sanofi-Aventis and  
27  
28 funding from the Geelong Region Medical Research Foundation, Barwon Health,  
29  
30 Perpetual Trustees, the Dairy Research and Development Corporation, The  
31  
32 University of Melbourne, the Ronald Geoffrey Arnott Foundation, ANZ Charitable  
33  
34 Trust, the American Society for Bone and Mineral Research, Amgen (Europe) GmbH  
35  
36 and the NHMRC.  
37  
38  
39

#### 40 41 42 43 **AUTHORS' CONTRIBUTIONS** 44 45

46  
47  
48 LJW took part in the conception and design of the study, data cleaning, statistical  
49  
50 analysis, interpretation of the data and took primary responsibility for writing the  
51  
52 manuscript. MB and SLB took part in the interpretation of data and critically revised  
53  
54 the manuscript. MH and ALS took part in the conception and design of the study,  
55  
56 statistical analysis, interpretation of the data and critically revised the manuscript.  
57  
58  
59  
60

1  
2  
3  
4  
5  
6  
7  
8  
9  
10  
11  
12  
13  
14  
15  
16  
17  
18  
19  
20  
21  
22  
23  
24  
25  
26  
27  
28  
29  
30  
31  
32  
33  
34  
35  
36  
37  
38  
39  
40  
41  
42  
43  
44  
45  
46  
47  
48  
49  
50  
51  
52  
53  
54  
55  
56  
57  
58  
59  
60

FNJ took part in the conception and design of the study, acquisition of the data and critically revised the manuscript. JAP took part in the conception and design of the study, interpretation of the analysis and critically revised the manuscript. All authors read and approved the final manuscript.

For peer review only

## REFERENCES

1. Lenze EJ, Rogers JC, Martire LM, Mulsant BH, Rollman BL, Dew MA, Schulz R, Reynolds CF, 3rd: **The association of late-life depression and anxiety with physical disability: a review of the literature and prospectus for future research.** *Am J Geriatr Psychiatry* 2001, **9**(2):113-135.
2. Kessler RC, Angermeyer M, Anthony JC, R DEG, Demyttenaere K, Gasquet I, G DEG, Gluzman S, Gureje O, Haro JM *et al*: **Lifetime prevalence and age-of-onset distributions of mental disorders in the World Health Organization's World Mental Health Survey Initiative.** *World Psychiatry* 2007, **6**(3):168-176.
3. Williams L, Jacka F, Pasco J, Henry M, Dodd S, Nicholson G, Kotowicz M, Berk M: **The prevalence of mood and anxiety disorders in Australian women.** *Australas Psychiatry* 2010, **18**(3):250-255.
4. Mathers C, Vos T, Stevenson C: **The burden of disease and injury in Australia.** In.: Australian Institute of Health and Welfare; 1999.
5. Gullberg B, Johnell O, Kanis JA: **World-wide projections for hip fracture.** *Osteoporos Int* 1997, **7**(5):407-413.
6. Sanders KM, Nicholson GC, Ugoni AM, Pasco JA, Seeman E, Kotowicz MA: **Health burden of hip and other fractures in Australia beyond 2000. Projections based on the Geelong Osteoporosis Study.** *Med J Aust* 1999, **170**(10):467-470.
7. Dennison E, Mohamed MA, Cooper C: **Epidemiology of osteoporosis.** *Rheum Dis Clin North Am* 2006, **32**(4):617-629.
8. Johnell O, Kanis JA: **An estimate of the worldwide prevalence and disability associated with osteoporotic fractures.** *Osteoporos Int* 2006, **17**(12):1726-1733.
9. Pasco JA, Sanders KM, Hoekstra FM, Henry MJ, Nicholson GC, Kotowicz MA: **The human cost of fracture.** *Osteoporos Int* 2005, **16**(12):2046-2052.
10. Lenze EJ, Munin MC, Dew MA, Rogers JC, Seligman K, Mulsant BH, Reynolds CF, 3rd: **Adverse effects of depression and cognitive impairment on**

- 1  
2  
3       **rehabilitation participation and recovery from hip fracture.** *Int J Geriatr*  
4       *Psychiatry* 2004, **19**(5):472-478.
- 5  
6  
7       11. Holmes J, House A: **Psychiatric illness predicts poor outcome after surgery**  
8       **for hip fracture: a prospective cohort study.** *Psychol Med* 2000, **30**(4):921-  
9       929.
- 10  
11  
12       12. Magaziner J, Simonsick EM, Kashner TM, Hebel JR, Kenzora JE: **Predictors of**  
13       **functional recovery one year following hospital discharge for hip fracture: a**  
14       **prospective study.** *J Gerontol* 1990, **45**(3):M101-107.
- 15  
16  
17       13. Wu Q, Liu J, Gallegos-Orozco JF, Hentz JG: **Depression, fracture risk, and**  
18       **bone loss: a meta-analysis of cohort studies.** *Osteoporos Int* 2010,  
19       **21**(10):1627-1635.
- 20  
21  
22       14. Sanna L, Stuart AL, Pasco JA, Kotowicz MA, Berk M, Girardi P, Brennan SL,  
23       Williams LJ: **Physical comorbidities in men with mood and anxiety disorders:**  
24       **a population-based study.** *BMC Med* 2013, **11**:110.
- 25  
26  
27       15. Pasco J, Nicholson G, Kotowicz M: **Cohort profile: Geelong Osteoporosis**  
28       **Study.** *Int J Epidemiol* 2011:1-11.
- 29  
30  
31       16. Sanders KM, Seeman E, Ugoni AM, Pasco JA, Martin TJ, Skoric B, Nicholson  
32       GC, Kotowicz MA: **Age- and gender-specific rate of fractures in Australia: a**  
33       **population-based study.** *Osteoporos Int* 1999, **10**(3):240-247.
- 34  
35  
36       17. Pasco JA, Henry MJ, Gaudry TM, Nicholson GC, Kotowicz MA: **Identification**  
37       **of incident fractures: the Geelong Osteoporosis Study.** *Aust N Z J Med* 1999,  
38       **29**(2):203-206.
- 39  
40  
41       18. Henry MJ, Pasco JA, Nicholson GC, Seeman E, Kotowicz MA: **Prevalence of**  
42       **osteoporosis in Australian women: Geelong Osteoporosis Study.** *J Clin*  
43       *Densitom* 2000, **3**(3):261-268.
- 44  
45  
46       19. Association AP: **Diagnostic and Statistical Manual of Mental Disorders**, 4th  
47       Edition, Text Revision edn. Washington: DC: American Psychiatric Association;  
48       2000.
- 49  
50  
51       20. Jacka FN, Pasco JA, Henry MJ, Kotowicz MA, Nicholson GC, Berk M: **Dietary**  
52       **omega-3 fatty acids and depression in a community sample.** *Nutr Neurosci*  
53       2004, **7**:101-106.
- 54  
55  
56  
57  
58  
59  
60

- 1  
2  
3  
4  
5  
6  
7  
8  
9  
10  
11  
12  
13  
14  
15  
16  
17  
18  
19  
20  
21  
22  
23  
24  
25  
26  
27  
28  
29  
30  
31  
32  
33  
34  
35  
36  
37  
38  
39  
40  
41  
42  
43  
44  
45  
46  
47  
48  
49  
50  
51  
52  
53  
54  
55  
56  
57  
58  
59  
60
21. Burns A, Younger J, Morris J, Baldwin R, Tarrier N, Pendleton N, Cohen P, Horan M, Banerjee S: **Outcomes Following Hip Fracture Surgery: A 2-Year Prospective Study.** *Am J Geriatr Psychiatry* 2013.
  22. Weng TY, Chen LC, Shyu HW, Chen SH, Wang JR, Yu CK, Lei HY, Yeh TM: **Lactoferrin inhibits enterovirus 71 infection by binding to VP1 protein and host cells.** *Antiviral Res* 2005, **67**(1):31-37.
  23. Bellelli G, Frisoni GB, Turco R, Trabucchi M: **Depressive symptoms combined with dementia affect 12-months survival in elderly patients after rehabilitation post-hip fracture surgery.** *Int J Geriatr Psychiatry* 2008, **23**(10):1073-1077.
  24. Holmes JD, House AO: **Psychiatric illness in hip fracture.** *Age Ageing* 2000, **29**(6):537-546.
  25. Silverman SL, Shen W, Minshall ME, Xie S, Moses KH: **Prevalence of depressive symptoms in postmenopausal women with low bone mineral density and/or prevalent vertebral fracture: results from the Multiple Outcomes of Raloxifene Evaluation (MORE) study.** *J Rheumatol* 2007, **34**(1):140-144.
  26. Mossey JM, Knott K, Craik R: **The effects of persistent depressive symptoms on hip fracture recovery.** *J Gerontol* 1990, **45**(5):M163-168.
  27. Ostir GV, Goodwin JS, Markides KS, Ottenbacher KJ, Balfour J, Guralnik JM: **Differential effects of premorbid physical and emotional health on recovery from acute events.** *J Am Geriatr Soc* 2002, **50**(4):713-718.
  28. Otmar R, Reventlow S, Morrow M, Nicholson G, Kotowicz M, Pasco J: **A cultural models approach to osteoporosis prevention and treatment.** *Sage Open* 2012:1-16.
  29. Stewart DE, Yuen T: **A systematic review of resilience in the physically ill.** *Psychosomatics* 2011, **52**(3):199-209.
  30. Kawachi I, Berkman M (ed.): **Social epidemiology.** New York: Oxford University Press; 2001.
  31. Subramanian S, Lochner K, Kawachi I: **Neighbourhood differences in social capital: a compositional artifact or a contextual construct?** *Health Place* 2003, **9**:33-44.

1  
2  
3  
4  
5  
6  
7  
8  
9  
10  
11  
12  
13  
14  
15  
16  
17  
18  
19  
20  
21  
22  
23  
24  
25  
26  
27  
28  
29  
30  
31  
32  
33  
34  
35  
36  
37  
38  
39  
40  
41  
42  
43  
44  
45  
46  
47  
48  
49  
50  
51  
52  
53  
54  
55  
56  
57  
58  
59  
60

32. Diez Roux AV: **Estimating neighborhood health effects: the challenges of causal inference in a complex world.** *Soc Sci Med* 2004, **58**(10):1953-1960.

33. Fava M, Kendler KS: **Major depressive disorder.** *Neuron* 2000, **28**(2):335-341.

For peer review only

Table 1: Characteristics of the fracture vs. non-fracture cohorts according to age ( $\leq 65$ yr and  $>65$  years). Values are given as median (interquartile range), mean ( $\pm$  standard deviation) or n (%).

|                                   | Women with fracture | Women with no fracture | p-values |
|-----------------------------------|---------------------|------------------------|----------|
| <b><math>\leq 65</math> years</b> | <b>n = 170</b>      | <b>n = 382</b>         |          |
| Age (yr)                          | 54.0 (45.0-60.2)    | 50.6 (43.2-58.5)       | 0.019    |
| Weight (kg)                       | 69.1 (61.4-78.4)    | 67.6 (60.1-79.0)       | 0.386    |
| Height (cm)                       | 162.2 $\pm$ 6.5     | 161.9 $\pm$ 5.9        | 0.619    |
| Depression (12-month)             | 17 (10.0%)          | 60 (15.7%)             | 0.074    |
| Physical activity (active)        | 117 (79.6%)         | 275 (75.6%)            | 0.328    |
| Alcohol consumption (current)     | 77 (52.4%)          | 198 (54.4%)            | 0.679    |
| Smoking (current)                 | 20 (26.7%)          | 40 (11.0%)             | <0.001   |
| <b><math>&gt;65</math> years</b>  | <b>n = 126</b>      | <b>n = 208</b>         |          |
| Age (yr)                          | 72.2 (69.2-76.4)    | 74.1 (70.3-81.0)       | 0.002    |
| Weight (kg)                       | 64.7 (57.0-70.6)    | 63.7 (56.0-71.9)       | 0.736    |
| Height (cm)                       | 157.21 $\pm$ 6.3    | 156.7 $\pm$ 6.4        | 0.502    |
| Depression (12-month)             | 12 (9.5%)           | 7 (3.4%)               | 0.019    |
| Physical activity (active)        | 48 (45.7%)          | 78 (50.0%)             | 0.497    |
| Alcohol consumption (current)     | 40 (38.1%)          | 69 (44.2%)             | 0.324    |
| Smoking (current)                 | 3 (5.3%)            | 3 (1.9%)               | 0.192    |

1  
2  
3  
4  
5  
6  
7  
8  
9  
10  
11  
12  
13  
14  
15  
16  
17  
18  
19  
20  
21  
22  
23  
24  
25  
26  
27  
28  
29  
30  
31  
32  
33  
34  
35  
36  
37  
38  
39  
40  
41  
42  
43  
44  
45  
46  
47  
48  
49  
50  
51  
52  
53  
54  
55  
56  
57  
58  
59  
60

For peer review only



## STROBE Statement—checklist of items that should be included in reports of observational studies

|                              | Item No | Recommendation                                                                                                                                                                                                                                                                                                                                                                                                                                                         |     |
|------------------------------|---------|------------------------------------------------------------------------------------------------------------------------------------------------------------------------------------------------------------------------------------------------------------------------------------------------------------------------------------------------------------------------------------------------------------------------------------------------------------------------|-----|
| <b>Title and abstract</b>    | 1       | (a) Indicate the study's design with a commonly used term in the title or the abstract                                                                                                                                                                                                                                                                                                                                                                                 | Y   |
|                              |         | (b) Provide in the abstract an informative and balanced summary of what was done and what was found                                                                                                                                                                                                                                                                                                                                                                    | Y   |
| <b>Introduction</b>          |         |                                                                                                                                                                                                                                                                                                                                                                                                                                                                        |     |
| Background/rationale         | 2       | Explain the scientific background and rationale for the investigation being reported                                                                                                                                                                                                                                                                                                                                                                                   | Y   |
| Objectives                   | 3       | State specific objectives, including any prespecified hypotheses                                                                                                                                                                                                                                                                                                                                                                                                       | Y   |
| <b>Methods</b>               |         |                                                                                                                                                                                                                                                                                                                                                                                                                                                                        |     |
| Study design                 | 4       | Present key elements of study design early in the paper                                                                                                                                                                                                                                                                                                                                                                                                                | Y   |
| Setting                      | 5       | Describe the setting, locations, and relevant dates, including periods of recruitment, exposure, follow-up, and data collection                                                                                                                                                                                                                                                                                                                                        | Y   |
| Participants                 | 6       | (a) <i>Cohort study</i> —Give the eligibility criteria, and the sources and methods of selection of participants. Describe methods of follow-up<br><i>Case-control study</i> —Give the eligibility criteria, and the sources and methods of case ascertainment and control selection. Give the rationale for the choice of cases and controls<br><i>Cross-sectional study</i> —Give the eligibility criteria, and the sources and methods of selection of participants | Y   |
|                              |         | (b) <i>Cohort study</i> —For matched studies, give matching criteria and number of exposed and unexposed<br><i>Case-control study</i> —For matched studies, give matching criteria and the number of controls per case                                                                                                                                                                                                                                                 | Y   |
| Variables                    | 7       | Clearly define all outcomes, exposures, predictors, potential confounders, and effect modifiers. Give diagnostic criteria, if applicable                                                                                                                                                                                                                                                                                                                               | Y   |
| Data sources/<br>measurement | 8*      | For each variable of interest, give sources of data and details of methods of assessment (measurement). Describe comparability of assessment methods if there is more than one group                                                                                                                                                                                                                                                                                   | Y   |
| Bias                         | 9       | Describe any efforts to address potential sources of bias                                                                                                                                                                                                                                                                                                                                                                                                              | N/A |
| Study size                   | 10      | Explain how the study size was arrived at                                                                                                                                                                                                                                                                                                                                                                                                                              | Y   |
| Quantitative variables       | 11      | Explain how quantitative variables were handled in the analyses. If applicable, describe which groupings were chosen and why                                                                                                                                                                                                                                                                                                                                           | Y   |
| Statistical methods          | 12      | (a) Describe all statistical methods, including those used to control for confounding                                                                                                                                                                                                                                                                                                                                                                                  | Y   |
|                              |         | (b) Describe any methods used to examine subgroups and interactions                                                                                                                                                                                                                                                                                                                                                                                                    | Y   |
|                              |         | (c) Explain how missing data were addressed                                                                                                                                                                                                                                                                                                                                                                                                                            | Y   |
|                              |         | (d) <i>Cohort study</i> —If applicable, explain how loss to follow-up was addressed<br><i>Case-control study</i> —If applicable, explain how matching of cases and controls was addressed<br><i>Cross-sectional study</i> —If applicable, describe analytical methods taking account of sampling strategy                                                                                                                                                              | Y   |
|                              |         | (e) Describe any sensitivity analyses                                                                                                                                                                                                                                                                                                                                                                                                                                  | N/A |

Continued on next page

| <b>Results</b>           |     |                                                                                                                                                                                                              |   |
|--------------------------|-----|--------------------------------------------------------------------------------------------------------------------------------------------------------------------------------------------------------------|---|
| Participants             | 13* | (a) Report numbers of individuals at each stage of study—eg numbers potentially eligible, examined for eligibility, confirmed eligible, included in the study, completing follow-up, and analysed            | Y |
|                          |     | (b) Give reasons for non-participation at each stage                                                                                                                                                         | Y |
|                          |     | (c) Consider use of a flow diagram                                                                                                                                                                           | N |
| Descriptive data         | 14* | (a) Give characteristics of study participants (eg demographic, clinical, social) and information on exposures and potential confounders                                                                     | Y |
|                          |     | (b) Indicate number of participants with missing data for each variable of interest                                                                                                                          | Y |
|                          |     | (c) <i>Cohort study</i> —Summarise follow-up time (eg, average and total amount)                                                                                                                             |   |
| Outcome data             | 15* | <i>Cohort study</i> —Report numbers of outcome events or summary measures over time                                                                                                                          |   |
|                          |     | <i>Case-control study</i> —Report numbers in each exposure category, or summary measures of exposure                                                                                                         | Y |
|                          |     | <i>Cross-sectional study</i> —Report numbers of outcome events or summary measures                                                                                                                           |   |
| Main results             | 16  | (a) Give unadjusted estimates and, if applicable, confounder-adjusted estimates and their precision (eg, 95% confidence interval). Make clear which confounders were adjusted for and why they were included | Y |
|                          |     | (b) Report category boundaries when continuous variables were categorized                                                                                                                                    |   |
|                          |     | (c) If relevant, consider translating estimates of relative risk into absolute risk for a meaningful time period                                                                                             |   |
| Other analyses           | 17  | Report other analyses done—eg analyses of subgroups and interactions, and sensitivity analyses                                                                                                               |   |
| <b>Discussion</b>        |     |                                                                                                                                                                                                              |   |
| Key results              | 18  | Summarise key results with reference to study objectives                                                                                                                                                     | Y |
| Limitations              | 19  | Discuss limitations of the study, taking into account sources of potential bias or imprecision. Discuss both direction and magnitude of any potential bias                                                   | Y |
| Interpretation           | 20  | Give a cautious overall interpretation of results considering objectives, limitations, multiplicity of analyses, results from similar studies, and other relevant evidence                                   | Y |
| Generalisability         | 21  | Discuss the generalisability (external validity) of the study results                                                                                                                                        | Y |
| <b>Other information</b> |     |                                                                                                                                                                                                              |   |
| Funding                  | 22  | Give the source of funding and the role of the funders for the present study and, if applicable, for the original study on which the present article is based                                                | Y |

\*Give information separately for cases and controls in case-control studies and, if applicable, for exposed and unexposed groups in cohort and cross-sectional studies.

**Note:** An Explanation and Elaboration article discusses each checklist item and gives methodological background and published examples of transparent reporting. The STROBE checklist is best used in conjunction with this article (freely available on the Web sites of PLoS Medicine at <http://www.plosmedicine.org/>, Annals of Internal Medicine at <http://www.annals.org/>, and Epidemiology at <http://www.epidem.com/>). Information on the STROBE Initiative is available at [www.strobe-statement.org](http://www.strobe-statement.org).
